1 **Sustained Ca<sup>2+</sup> mobilizations: a quantitative approach to predict**  
2 **their importance in cell-cell communication and wound healing**

3

4 Ca<sup>2+</sup> Mobilizations and Cell-Cell Communication

5

6 Yoonjoo Lee<sup>1</sup>, Min Tae Kim, Garrett Rhodes, Kelsey Sack<sup>3</sup>, Sung Jun Son, Celeste B. Rich<sup>2</sup>, Vijaya B.

7 Kolachalama<sup>4</sup>, Christopher V Gabel<sup>1</sup> and Vickery Trinkaus-Randall<sup>2,5\*</sup>

8

9 <sup>1</sup> Department of Pharmacology and Experimental Therapeutics, Boston University School of Medicine, Boston,

10 Massachusetts, United States of America

11 <sup>2</sup> Department of Biochemistry, Boston University School of Medicine, Boston, Massachusetts, United States of

12 America

13 <sup>3</sup> Department of Medicine, Beth Israel Deaconess Medical Center, Boston, Massachusetts, United States of

14 America

15 <sup>4</sup> Department of Medicine, Boston University School of Medicine, Boston, Massachusetts, United States of

16 America

17 <sup>5</sup> Department of Ophthalmology, Boston University School of Medicine, Boston, Massachusetts, United States of

18 America

19

20 \* Corresponding Author

21 E-mail: [vickery@bu.edu](mailto:vickery@bu.edu)

22

23

## 24 **Abstract**

25           Epithelial wound healing requires the coordination of cells to migrate as a unit over the basement  
26 membrane after injury. To understand the process of this coordinated movement, it is critical to study the  
27 dynamics of cell-cell communication. We developed a method to characterize the injury-induced sustained  
28  $\text{Ca}^{2+}$  mobilizations that travel between cells for periods of time up to several hours. These events of  
29 communication are concentrated along the wound edge and are reduced in cells further away from the  
30 wound. Our goal was to delineate the role and contribution of these sustained mobilizations and using  
31 MATLAB analyses, we determined the probability of cell-cell communication events in in vitro models and  
32 ex vivo organ culture models. We demonstrated that the injury response was complex and represented the  
33 activation of a number of receptors. In addition, we found that pannexin channels mediated the cell-cell  
34 communication and motility. Furthermore, the sustained  $\text{Ca}^{2+}$  mobilizations are associated with changes in  
35 cell morphology and motility during wound healing. The results demonstrate that both purinoreceptors and  
36 pannexins regulate the sustained  $\text{Ca}^{2+}$  mobilization necessary for cell-cell communication in wound healing.  
37

## 38 **Introduction**

39           The epithelium serves as a barrier to external disruptions such as injury or environmental factors and  
40 repair requires coordination between cells to migrate over the basement membrane and close the wound. To  
41 understand how epithelial cells move as a unit after injury, the dynamics of cell-cell communication and  
42 coordination of the process need to be studied. An excellent model tissue is the corneal epithelium, which is an  
43 avascular stratified squamous tissue that responds to growth factors and nucleotides when the epithelial barrier is  
44 damaged. One signal that has a ubiquitous response in epithelial wound healing is the release of the nucleotide,  
45 ATP, which may occur because of a change in cell shape as in bronchial epithelia and corneal epithelial injury, or

46 an alteration in force such as in glaucoma [1-3]. Within milliseconds to seconds after injury, extracellular ATP  
47 binds to purinoreceptors and triggers a transient  $\text{Ca}^{2+}$  wave, which is used by cells to transduce mechanical  
48 signals into chemical signals and alter signaling pathways [4-8]. This response is mimicked in unwounded  
49 cultures that are exposed to medium collected from injured cells; however the response is absent when the wound  
50 medium is pretreated with apyrase, an ectonucleotidase [5].

51

52 Nucleotides are ligands for a number of purinergic receptors, such as P2Y [G protein-coupled receptors  
53 (GPCR)] and P2X (ligand gated ion channels), which are known to mediate cell migration, proliferation, and  
54 inflammation [9]. Nucleotides affect the phosphorylation of a number of proteins, including epidermal growth  
55 factor receptor (EGFR), Src, extracellular-signal-regulated protein kinase (ERK),  $\beta$ 4 integrin, and paxillin  
56 [5,7,10]. Furthermore knocking down the G-protein purinoreceptor, P2Y2, results in a decrease in  $\text{Ca}^{2+}$   
57 mobilizations, wound healing and phosphorylation of paxillin (Y118) and EGFR (Y1068), but not EGFR (Y1173)  
58 [7,11]. In contrast knocking down the P2Y4 receptor did not significantly reduce the injury-induced response  
59 [11]. In addition, only the P2Y2 receptor increased in expression after injury [7]. Another purinoreceptor where  
60 significant changes were detected was P2X7, which exhibited a planar polarity after injury, was prominent at the  
61 leading edge and where the polarity was abrogated in the pre-diabetic model [10]. Furthermore, P2X7 expression  
62 was significantly elevated in diabetic corneas, and the corneal epithelium of a murine pre-diabetic model  
63 displayed a similar elevated mRNA [12-13]. These data led us to hypothesize that the purinoreceptors act as  
64 sensors. Additional evidence from other cell systems suggests the presence of a feed-forward system where ATP  
65 moves through pannexin channels and activates P2X7 receptors [14]. This type of system would suggest a  
66 continuous release of ATP along the wound margin. For example, ATP is released by neutrophils and appears to  
67 act for chemotaxis during inflammation while in another cell system, the channel protein, pannexin1, plays a role  
68 in cell migration during injury in dendritic cells [15-18].

69

70 In this study we developed a novel method to identify and characterize the degree of cell-cell  
71 communication that occurs through sustained  $\text{Ca}^{2+}$  mobilizations after injury, which are concentrated along the  
72 epithelial wound edge and reduced in cells distal to the injury. Using MATLAB analyses, we generated profiles  
73 of the sustained  $\text{Ca}^{2+}$  mobilizations, and demonstrated that the  $\text{Ca}^{2+}$  response was replicated in ex vivo organ  
74 culture models. The sustained  $\text{Ca}^{2+}$  mobilizations were present also after stimulation with either BzATP or UTP,  
75 and the probability that cells would communicate was greater in response to BzATP. The specificity was  
76 demonstrated using competitive inhibitors of P2Y2 and P2X7, AR-C 118925XX and A438079 respectively.  
77 Likewise, an inhibitor of pannexin1 attenuated both the wound and BzATP agonist initiated response. These  
78 sustained mobilizations are correlated with changes in cellular morphology and motility, which were prominent in  
79 cells at the leading edge during cell migration after wounding. Together, our results demonstrate that the sustained  
80  $\text{Ca}^{2+}$  mobilizations mediated by purinoreceptors and pannexins are a vital component in regulating the long-term  
81 response to injury.

82

## 83 **Materials and Methods**

### 84 **Reagents**

85 ATP, 2,3-O-(4-benzoylbenzoyl)-ATP (BzATP), and UTP were all purchased from Sigma-Aldrich (St.  
86 Louis, MO). A438079 hydrochloride, AR-C 118925XX, 10Panx Inhibitory peptide, and scramble control peptide  
87 were purchased from Tocris Biosciences (Minneapolis, MN). Pannexin-1 polyclonal rabbit antibodies were  
88 purchased from Alomone (Jerusalem, Israel), and Connexin-43 (Cx43) polyclonal rabbit antibodies were  
89 purchased from Santa Cruz Biotechnology (Santa Cruz, CA).

90

## 91 **Cell culture**

92 Human corneal limbal epithelial (HCLE) cells, a gift from Dr. Gipson (Schepens Eye Research  
93 Institute/Mass. Eye and Ear, Boston, MA) were evaluated for mycoplasma [19]. The HCLE cell line was verified at  
94 Johns Hopkins DNA Services (Baltimore, MD). Cells were maintained in Keratinocyte Serum-Free Media  
95 (KSFM) with growth supplements (25- $\mu$ g/mL bovine pituitary extract, 0.02 nM EGF, and 0.3 mM CaCl<sub>2</sub>). Cells  
96 were passaged when 70-80% confluent and plated on either glass bottom dishes (MatTek Corporation, Ashland,  
97 MA) for live cell imaging, scratch wound assays, and immunofluorescence, or on cell culture-treated plastic petri  
98 dishes for Western blot analysis for approximately 72 hours prior to experimentation at a density of 150  
99 cells/mm<sup>2</sup>. Approximately 16-24 hours before experimentation, the media was changed to unsupplemented  
100 KSFM, as previously described [10].

101

## 102 **Organ culture and tissue preparation**

103 The research protocol conformed to the standards of the Association for Research in Vision and  
104 Ophthalmology for the Use of Animals in Ophthalmic Care and Vision Research and the Boston University  
105 IACUC. C57BL/6J mice were obtained from Jackson Laboratory (The Jackson Laboratory; Bar Harbor, ME). For  
106 organ culture live imaging, the corneas were enucleated and incubated in KSFM at 37 °C and 5% CO<sub>2</sub>. To prepare  
107 tissues for immunohistochemistry, a 1.5mm-diameter trephine was used to delineate the region in the central  
108 cornea that would be wounded by removing or abrading the epithelium. After wounding, the corneas were  
109 dissected, leaving an intact scleral rim, and incubated in Dulbecco's modified Eagle's medium (DMEM) at 37 °C  
110 and 5% CO<sub>2</sub>, as described [10, 20].

111

## 112 **Live cell confocal imaging**

### 113 **Ca<sup>2+</sup> mobilization studies**

114 All image studies were imaged on the Zeiss Axiovert LSM 880 confocal microscope, with the ex vivo  
115 live-imaging utilizing the FAST module and AIRYScan (Zeiss, Thornwood, NY). Ca<sup>2+</sup> mobilization was  
116 performed on HCLE cells as previously described and on ex vivo mouse corneas [10, 21]. For in vitro imaging,  
117 HCLE cells were cultured to confluence on glass bottom dishes and pre-loaded with 5 μM Fluo-3AM fluorescent  
118 dye (Invitrogen, Carlsbad, CA) to allow for Ca<sup>2+</sup> visualization, at a final concentration of 1% (v/v) DMSO and  
119 2% (w/v) pluronic acid at 37°C and 5% CO<sub>2</sub> [10]. Images were collected after any of the following experiments:  
120 agonist stimulation by addition of either BzATP or UTP (final concentration of 25 μM), or scratch-wound injury  
121 and taken every 3 seconds for up to 2 hours in length. For ex vivo imaging of mouse corneas, the corneas were  
122 mounted on glass bottom dishes and preincubated with 50 μM Fluo-3AM fluorescent dye for one hour and  
123 CellMask™ Deep Red Plasma membrane stain, which was used at 1:10000 (CellMask™:media) (Thermo  
124 Fisher, Waltham, MA), at a final concentration of 1% (v/v) DMSO and 20% (w/v) pluronic acid for 30 minutes at  
125 37°C and 5% CO<sub>2</sub>.

126

### 127 **Cell shape changes and migration**

128 To examine cell migration and alterations in cell shape, HCLE cells were pre-loaded with either  
129 CellMask™ Deep Red Plasma membrane stain as described above or 1 μM of SiR-Actin Spirochrome probe  
130 (Cytoskeleton Inc., Denver, CO) for 10 minutes at 37°C and 5% CO<sub>2</sub>, for imaging of F-actin. Both long- and  
131 short-term studies were performed. For long-term studies, images were collected immediately after injury and  
132 every 5 minutes for 6 hours on a Zeiss Axiovert LSM 880 confocal microscope. For short-term studies, images  
133 were taken immediately after injury and every 5 seconds for up to 2 hours on a Zeiss Axiovert LSM 880 confocal  
134 microscope. Analyses for all the described image studies were performed using FIJI/ImageJ (NIH, Bethesda, MD);

135 <http://imagej.nih.gov/ij/>) along with MATLAB programs (MATLAB, MathWorks, Inc.) written for the analysis  
136 described below.

137

## 138 **Modeling of Ca<sup>2+</sup> waves**

139 To analyze spatiotemporal communication between individual cells or groups of cells, videos were  
140 collected from each experiment and exported in TIF or AVI format. Two different custom MATLAB scripts were  
141 employed to analyze Ca<sup>2+</sup> responses based on cell population (individual cells or a population of cells). The  
142 individual cell analysis technique was previously described [22]. To examine cell-cell communication we  
143 developed a script to 1) Identify Ca<sup>2+</sup> events and generate an event kymograph; and 2) Calculate the probability of  
144 neighboring cells having a Ca<sup>2+</sup> event that was induced within 10 frames after an established Ca<sup>2+</sup> event had  
145 occurred in a given cell. Cell positions were marked by either an automated computer program or manual  
146 detection. Signaling events within each trace were identified as being greater than a threshold of 50% of the  
147 maximum normalized fluorescent signal. A cluster was defined as a group of 2-3 adjacent cells where Ca<sup>2+</sup>  
148 mobilizations occurred, and the number of clusters was measured over time. Neighboring cells were identified as  
149 all cells within <35 μm of one another. The neighboring cells displaying events within 10 frames (30 seconds) of  
150 each other were scored as “correlated” events. The probability that an event in any particular cell triggered a  
151 correlated event in any of its neighbors was calculated and defined as the “event probability.”

152

## 153 **ATP release assay**

154 To determine concentration of ATP released after injury, HCLE cells were plated on culture-treated  
155 plastic and grown to confluence in KSFM containing growth supplements. The growth supplements were  
156 removed from the media 24 hours before wounding. To wound the cells, a comb made from plastic gel-loading  
157 tips was used to make a scratch wound, and the media was collected every 20 minutes and clarified by  
158 centrifugation at 663 x g. The clarified media was collected and stored on ice until ready for analysis with a

159 luciferase-based ATP Determination Kit (Invitrogen, Carlsbad, CA). Samples were vortexed and 5  $\mu$ L aliquots  
160 were plated on a white-bottomed 96-well plate (Corning). A reaction buffer (0.5 mM D-luciferin, 1.25  $\mu$ g/mL  
161 firefly luciferase, 25 mM Tricine buffer, pH 7.8, 5 mM MgSO<sub>4</sub>, 100  $\mu$ M EDTA, and 1 mM DTT) was prepared  
162 immediately before analysis and protected from light. To determine ATP levels, luciferase-generated  
163 luminescence was detected using a BioTek Synergy HT plate reader with injector (BioTek, Winooski, VT). A  
164 standard curve of ATP was made in KSFM only. To ensure equal time for each reaction, 95  $\mu$ L of reaction buffer  
165 was injected into a well and allowed to incubate for four seconds before luminescence was read. ATP levels were  
166 calculated from raw luminescence values using the standard curve.

## 167 **Immunofluorescence and confocal microscopy**

168 HCLE cells and mouse corneas were fixed in freshly prepared 4% paraformaldehyde in PBS for 20  
169 minutes at room temperature (cells) or overnight at 4°C (corneas). Immunofluorescent staining was performed  
170 [10]. Briefly, cells and corneas were permeabilized with 0.1% (v/v) Triton X-100 in PBS for 2-5 minutes and  
171 blocked with 4% BSA in PBS (blocking solution) for 1 hour. Cells and corneas were incubated in primary  
172 antibody solutions overnight at 4°C, and the following day they were incubated with the corresponding Alexa  
173 Fluor-conjugated secondary antibody (Invitrogen, Carlsbad, CA) at a dilution of 1:100 in blocking solution for 1  
174 hour at room temperature. Rhodamine-conjugated phalloidin (Invitrogen, 1:50) was used to visualize F-actin.  
175 Cells and corneas were mounted using VectaSHIELD with DAPI (Vector Labs, Burlingame, CA). Images were  
176 obtained on a Zeiss LSM 700 (Zeiss, Thornwood, NY) confocal microscope with indicated objectives and  
177 settings, and analyzed using ZEN (Zeiss, Thornwood, NY) or FIJI/ImageJ (NIH, Bethesda, MD;  
178 <http://imagej.nih.gov/ij/>).

179

## 180 **Statistical Analysis**

181 At least three independent experiments were run for each set of samples, and the mean  $\pm$  standard error of the  
182 mean (SEM) was determined. Statistical significance was determined by unpaired, one-tailed Student's t-test or



183 two-way ANOVA with appropriate post hoc tests using GraphPad Prism 5 (GraphPad Software, San Diego, CA)  
184 and R studio (RStudio, Inc., Boston, MA).

185

## 186 **Results**

### 187 **Sustained Ca<sup>2+</sup> mobilizations after injury recruit cells along the wound margin**

188 In this study, we investigated the hypothesis that sustained Ca<sup>2+</sup> mobilizations are responsible for cell-cell  
189 communication, which underlies the collective cell migration of corneal epithelial cells after agonist stimulation  
190 or injury. First, we examined the Ca<sup>2+</sup> mobilization within HCLE cells by live-cell imaging before and after  
191 wounding. Single-frame images of the Ca<sup>2+</sup> mobilization before and after (0, 5, and 120 mins) a scratch wound  
192 are shown (Fig 1A, first panel). Immediately after wounding, there is a large mobilization of Ca<sup>2+</sup> that is transient  
193 and has been described [2] (Fig 1A, first panel 0 min). To examine the response we outlined the cells along the  
194 leading edge of the wound, thereby depicting the regions of interest (ROI: Fig 1A middle panel, outlined in  
195 white). From this data, we generated a kymograph (Fig 1A, third panel), representing each of the individual  
196 leading edge cells (ticks along the y-axis) and the changes in fluorescence intensity over time (Fig 1A, third  
197 panel). At t=0 (wounding), the initial Ca<sup>2+</sup> wave was observed, as indicated by the high intensity of Ca<sup>2+</sup>  
198 (intensity scale) and this is followed by Ca<sup>2+</sup> mobilizations that are sustained for up to two hours (Fig 1A  
199 kymograph, S1 Movie). We speculated that regions of neighboring cells at the leading edge displayed a  
200 synchronicity, indicating that the transfer of information between cells may be involved in wound healing (Fig 1A  
201 kymograph). The cells back from the leading edge, denoted by being at least two cells distal from the wound,  
202 were less active compared to the cells at the leading edge of the wound (S1 Fig).

203

204 **Fig 1. Communication between cells after injury is inhibited by purinergic inhibitors.** (A) Representative

205 images of the initial Ca<sup>2+</sup> wave and the sustained Ca<sup>2+</sup> mobilizations upon scratch wounding (wound marked with

206 asterisks). Based on the outlined cells closest to the wound edge (in white), kymographs of the cells closest to the  
207 wound edge were generated to observe fluorescent intensity changes over time. The brackets on the left of each  
208 horizontal row represents the activity of a single cell. Cells were preincubated in 5  $\mu$ M Fluo3-AM for 30 minutes  
209 and imaged on the Zeiss Axiovert LSM 880 confocal laser scanning microscope. Scale bar = 60  $\mu$ m. (n=7). (B)  
210 Graph of the mean extracellular ATP concentration over time after injury compared to unwounded control. Error  
211 bars represent SEM (n=3). (C) Comparison of representative fluorescence over time after treatment with ATP,  
212 ATP and apyrase, and EGF. Black arrowhead marks the time apyrase was added. Apyrase abrogated the Ca<sup>2+</sup>  
213 response. EGF induced negligible Ca<sup>2+</sup> mobilizations compared to that of ATP. (n=4). (D) Injury induced  
214 response (Normalized intensity value of fluorescence) in presence or absence of inhibitors: A438079 (P2X7  
215 competitive inhibitor) or AR-C 118925XX (P2Y2 competitive inhibitor) (n=4).

216

217 In addition to live-cell imaging of the Ca<sup>2+</sup> mobilization, ATP in the media from HCLE cells (control and  
218 wounded) was examined by luciferase assay. As seen in Figure 1B, the concentration of ATP in wounded media  
219 was significantly greater than control for at least three hours. Moreover, it was six-fold higher in the wounded  
220 sample than the unwounded control after 60 minutes (Fig 1B). This continuous presence of extracellular ATP  
221 after injury could be responsible for maintaining the sustained Ca<sup>2+</sup> mobilizations (Fig 1A).

222

223 To assess the role of ATP, we compared the response of unwounded cells to ATP, ATP + apyrase, or  
224 EGF and measured the normalized intensity value of fluorescence. Previously we had demonstrated the role of  
225 ATP and the ectonucleotidase, apyrase, on the initial mobilization [2, 5]. In the current experiments we  
226 demonstrated the role of apyrase on sustained mobilizations (Fig 1C, red and blue lines) by adding apyrase after  
227 the initial Ca<sup>2+</sup> wave (arrowhead). The addition quenched the subsequent Ca<sup>2+</sup> mobilizations (Fig 1C, blue line),  
228 indicating that the sustained Ca<sup>2+</sup> mobilizations were dependent upon the presence of nucleotides. Together the  
229 data signify that the mobilizations and downstream signals depend upon extracellular ATP (Fig 1C, blue line).  
230 Previously, we showed that there was a minor response to EGF and that the EGFR inhibitor, AG1478, suppressed

231 the EGF-induced  $\text{Ca}^{2+}$  response, but not the ATP-induced response [2]. We also reported that EGFR became  
232 phosphorylated on tyrosine residues after injury, and P2Y2 played a role in EGFR cross-activation during cell  
233 migration [5, 7]. Therefore, we asked if EGF could induce the sustained  $\text{Ca}^{2+}$  mobilizations; but did not detect  
234 mobilizations above background levels (Fig 1C, yellow line). These findings support the hypothesis that the  
235 sustained  $\text{Ca}^{2+}$  mobilizations are specific to extracellular ATP, indicating that purinoreceptors may play a major  
236 role in cell-cell communication.

237

### 238 **Sustained $\text{Ca}^{2+}$ mobilizations are mediated through P2X7 and P2Y2 receptors**

239 Through a series of siRNA knockdown and inhibition experiments, we demonstrated that the P2Y2 and  
240 P2X7 receptors are major role players in the initial  $\text{Ca}^{2+}$  response after injury [10-12]. While the cornea expresses  
241 a number of P2 purinergic receptors, the latter two receptors have a prominent role in  $\text{Ca}^{2+}$  mobilization after  
242 wounding and cell migration, and their expression changes after injury [7, 10-11, 13, 23]. Given these reports and  
243 our observation of sustained extracellular ATP-mediated  $\text{Ca}^{2+}$  mobilization (Fig 1C), we hypothesized that P2X7  
244 and P2Y2 are involved in the sustained  $\text{Ca}^{2+}$  mobilizations, prompting the development of quantitative methods to  
245 examine events of cell communication during the sustained mobilizations. To determine quantitative changes in  
246 cell-cell communication, all cells must be inhibited and since siRNA knockdowns were over 60% efficient, we  
247 used competitive inhibitors A438079 (for P2X7) and AR-C 118925XX (P2Y2) to achieve a uniform inhibition.  
248 The epithelial cells were preincubated with competitive inhibitors to purinergic receptors, wounded, and imaged  
249 over time. When cells were incubated with either A438079 (competitive inhibitor to P2X7) (green line) or AR-C  
250 118925XX (competitive inhibitor for P2Y2 receptor) (orange line) and then wounded, the sustained responses  
251 were attenuated (Fig 1D).

252

253 To analyze the role of the purinoreceptors in cell-cell communication, we examined the sustained  $\text{Ca}^{2+}$   
254 mobilization patterns in HCLE cells after activation with the agonists, BzATP or UTP, for a minimum of 45

255 minutes. The concentration of agonist was adapted from receptor kinetics data of the initial wave [21]. We  
256 observed that sustained  $\text{Ca}^{2+}$  mobilizations traveled within groups of three or more cells at any given time, which  
257 we defined as a “cluster”, for both P2X7 and P2Y2 receptors (S2 and S3 Movies). The response to UTP was  
258 intense and decreased over time, while the response to BzATP had a slower onset and then intensified within  
259 clusters of cells (S2 and S3 Movies). We analyzed the  $\text{Ca}^{2+}$  responses of these clusters with cell-based MATLAB  
260 analysis scripts (Fig 2A), which were designed to detect individual cells, and demonstrated that each agonist  
261 elicited a unique profile [22]. The analysis revealed that the average percent of active cells and cluster number  
262 over time in response to BzATP was less than that detected in response to UTP (Fig 2B). These data indicate that  
263 while both agonists generate immediate and sustained  $\text{Ca}^{2+}$  mobilizations, their output patterns are unique.

264

265 **Fig 2. Analysis of UTP and BzATP induced  $\text{Ca}^{2+}$  mobilizations.** (A) Schematic of cell-based approach of the  
266  $\text{Ca}^{2+}$  analysis. Cells are identified using coordinates from the image study video and event kymographs generated.  
267 (B) Representative graphs of percent cells activated over time and cluster number versus time for BzATP and  
268 UTP agonist image studies (n=6). (C) Representative kymographs and event charts of UTP and BzATP agonist  
269 image studies. To reduce the background noise from the high-intensity initial  $\text{Ca}^{2+}$  oscillations, mobilizations are  
270 analyzed 10 minutes after inducing the  $\text{Ca}^{2+}$  mobilizations with agonist (n=6). (D) Schematic of event probability  
271 based on MATLAB-detected events. (E) Comparison of the average event probability values for each of the  
272 agonists and their specific inhibitors, A438079 (P2X7 competitive inhibitor), AR-C 118925XX (P2Y2  
273 competitive inhibitor). Data are means  $\pm$  SEM and were analyzed with a Tukey's multiple comparisons test  
274 (\*p<0.05 for each of the indicated comparisons, n=4).

275

276 To quantify the distinct sustained  $\text{Ca}^{2+}$  mobilization patterns in response to the agonists, kymographs  
277 were generated that reflected all of the cells with a known location of each cell. The graph displays activity  
278 approximately 10 mins after the immediate  $\text{Ca}^{2+}$  response (Fig 2C), which allowed for reduction of background  
279 noise that occurred due to the high-intensity produced by the immediate  $\text{Ca}^{2+}$  response. The events that were

280 detected were processed with another MATLAB-based script that calculated “event probability”, which was  
281 defined as the probability of one cell displaying a  $\text{Ca}^{2+}$  event within 10 frames of a detected event of a  
282 neighboring cell (Fig 2D). While we demonstrated that BzATP elicited fewer total number of detected  $\text{Ca}^{2+}$   
283 events compared to UTP (Fig 2C), the average communication event probability for UTP was significantly lower  
284 than that for BzATP (\* $p < 0.05$ ) (Fig 2E). These results indicate that the sustained  $\text{Ca}^{2+}$  mobilization in response to  
285 BzATP, while less active overall compared to UTP, exhibits a more coordinated pattern of cell-cell  
286 communication. Similar experiments performed with competitive inhibitors to P2X7 or P2Y2 revealed that the  
287  $\text{Ca}^{2+}$  event probabilities significantly decreased compared to their respective agonist controls (\* $p < 0.05$ ) (Fig 2E).  
288 Together these indicate that the receptors most likely to be responsible for cell-cell communication are P2Y2 and  
289 P2X7.

290

291 While analyzing the event probability for HCLE cells stimulated by an agonist revealed a distinct  
292 response, our ultimate goal was to determine the profile of the sustained  $\text{Ca}^{2+}$  mobilization pattern after injury.  
293 Based on our initial observations that the immediate  $\text{Ca}^{2+}$  response was generated in cells closest to the wound,  
294 the cells in wounded culture were categorized into two groups: the first two rows of cells closest to the wound  
295 were defined as the leading edge (LE) and the cells in rows further away were defined as back from leading edge  
296 (BFLE). The event kymographs and the resulting detected events demonstrated that the LE cells had a larger  
297 number of cells exhibiting  $\text{Ca}^{2+}$  activity compared to BFLE cells (Fig 3A and 3B). When the potential for cell-cell  
298 communication was quantified, the average event probability between LE cells was significantly higher  
299 (\*\* $p < 0.01$ ) than that of BFLE cells (Fig 3C). When the LE wounded cell event probability values were compared  
300 to the agonist induced events, they were statistically similar to those stimulated with BzATP (Fig 3D). These  
301 results imply that the P2X7 receptor may play a role in the healing response of LE cells to coordinate the  
302 collective migration process in wound closing. To test the role of P2X7 and P2Y2 in cell-cell communication  
303 during wound healing, we calculated the event probability of the LE cells when preincubated with either A438079  
304 or AR-C 118925XX. While the A438079 wounded group had a significantly reduced (\*\* $p < 0.001$ ) event

305 probability compared to control, the AR-C 118925XX wounded group had no detectable event probability (Fig  
306 3E). While the wound response after pretreatment with AR-C 118925XX did have visible  $\text{Ca}^{2+}$  events, they were  
307 not between neighboring cells, which is required to calculate the event probability values. Given that both  
308 receptors are activated by the ATP released from wounded epithelial cells, these differing results imply that  $\text{Ca}^{2+}$   
309 signaling is orchestrated via cooperation between P2X7 and P2Y2 receptors.

310

311 **Fig 3. Communication events between cells depend on distance from wound.** (A and B) Representative  
312 kymographs and detected event charts of the leading edge (LE) (A) and back from the leading edge (BFLE) (B).  
313 Analysis was performed 10 minutes after wounding. (n=3). (C) Event probability values for LE and BFLE cells  
314 after wounding. Data are mean  $\pm$  SEM and were analyzed with a two-tailed unpaired t-test (\*\*p<0.002, n=3). (D)  
315 Event probability values for the LE wound and BzATP agonist response. Data are mean  $\pm$  SEM and were  
316 analyzed with a two-tailed unpaired t-test (ns, n=3). (E) Event probability values for the LE when cells were  
317 preincubated in the presence or absence of A438079 or AR-C 118925XX before scratch-wounding. Data are  
318 mean  $\pm$  SEM and were analyzed with a one-way ANOVA with the Tukey's multiple comparisons test  
319 (\*\*p<0.001, n=4).

320

### 321 **Activation of purinoreceptors promote cell migration after injury**

322 To examine the role of the purinoreceptors on cell motility, cells were loaded with Fluo-3AM (cyan) and  
323 CellMask™ (Fire LUT), injured, and monitored over several hours (Fig 4A, S4 Movie). Cells either displaying  
324 sustained  $\text{Ca}^{2+}$  mobilizations or lack thereof were classified as “active” and “inactive” cells respectively. The two  
325 groups of cells were tracked with CellMask™ membrane dye, and the cell membrane traces were used to record  
326 motility and change in cell shape (Fig 4B). Active cells exhibited a change in cell shape over time and  
327 demonstrated cell motility (Fig 4A). Based on these observations, we hypothesized that sustained  $\text{Ca}^{2+}$   
328 mobilization patterns, altered cellular morphology and motility are necessary for proper wound healing, and these  
329 events play a role in orchestrating collective epithelial cell migration during wound repair.

330

331 **Fig 4. Ca<sup>2+</sup> mobilizations between cells correlate with changes in cell shape.** (A) Live-cell imaging of the  
332 wound edge. Cells were incubated with CellMask™ membrane dye (Fire LUT) and Fluo-3AM (cyan) 10 minutes  
333 after injury to examine cell shape changes and Ca<sup>2+</sup> mobilizations. The edge of the wound is marked with an  
334 asterisk. (B) Cell traces were made for cells that exhibited active and inactive Ca<sup>2+</sup> mobilization. When Ca<sup>2+</sup>  
335 mobilizations are present between cells (Active), changes in cell shape are detected. When Ca<sup>2+</sup> mobilizations are  
336 absent (Inactive), there is no detectable change in cell morphology. Scale bar = 34 μm. (n=3 for both A and B).

337

338 **Ca<sup>2+</sup> mobilizations between cells occur through pannexin channels but not connexin**  
339 **gap junctions**

340 In order to determine how sustained Ca<sup>2+</sup> mobilizations transmitted from cell-cell, we examined the role  
341 of connexin gap junctions, specifically connexin 43 (Cx43), and pannexin channels in cell-cell communication.  
342 Immunohistochemistry studies demonstrated that Cx43 was present as punctate staining (Fig 5A, yellow) along  
343 the cellular membrane in HCLE cells seeded at a high density, but not at a low density (Fig 5A). To test whether  
344 gap junctions were responsible for the transmission of sustained Ca<sup>2+</sup> mobilizations, we preincubated the cells  
345 with alpha-glycyrrhethinic acid (α-GA), a connexin-specific inhibitor that disassembles junctions [2]. Utilizing the  
346 cell-based MATLAB analysis scripts, we demonstrated that while α-GA dampens the % of activated cells, it does  
347 not alter the average cluster number (Fig 5B). Furthermore, there was no significant difference in the mean event  
348 probability values between the two groups (Fig 5C). These results indicate that propagation of events between  
349 cells does not occur via gap junctions but instead through some other means.

350

351 **Fig 5. Connexin-43 (Cx43) channels do not mediate the mean event probability.** (A) Localization of Cx43  
352 (white in the Cx43 only image, yellow in the composite image). Cells were counter-stained with rhodamine  
353 phalloidin (red) and DAPI (blue). Higher cell density and confluence correlated with extend of localization of

354 connexin along the cell membrane. Scale bar = 42  $\mu\text{m}$ . (n=4). (B) Representative graphs of percent cells activated  
355 over time and cluster number versus time for  $\text{Ca}^{2+}$  mobilization determined from videos of cells preincubated  
356 with 120  $\mu\text{M}$   $\alpha$ -GA and control. (n=4). (C) Event probability values for the control and  $\alpha$ -GA treated group. Data  
357 are mean  $\pm$  SEM and were analyzed with a two-tailed unpaired t-test (ns, n=3).

358

359 A second candidate communication pathway is pannexin, specifically pannexin 1. Our previous  
360 observation that apyrase quenched the  $\text{Ca}^{2+}$  response led us to hypothesize that pannexin1's localized ATP release  
361 was responsible for the propagation of the sustained  $\text{Ca}^{2+}$  mobilizations. To test whether inhibiting pannexin  
362 would affect  $\text{Ca}^{2+}$  mobilizations, we used 10Panx, a pannexin-specific inhibitor, and the scramble Panx peptide  
363 control (Ctrl) [24-25]. When cells were preincubated with 10Panx and stimulated with BzATP, there was a  
364 significant decrease in the percent of activated cells and cluster number over time in the 10Panx group compared  
365 to Ctrl (Fig 6A). We also demonstrated that P2X7 interacted with pannexin1 in epithelial cells using in situ  
366 crosslinking studies (S2 Fig). Stimulation of cells using the agonists, BzATP and UTP, allowed us to demonstrate  
367 that inhibition of pannexin channels abrogated the sustained  $\text{Ca}^{2+}$  mobilizations stimulated with BzATP.  
368 Furthermore, inhibition with 10Panx, resulted in an event probability that was significantly decreased  
369 (\*\* $p < 0.009$ ) (Fig 6B); whereas stimulation of cells previously inhibited with 10Panx stimulation did not  
370 significantly reduce cell-cell communication (Fig 6B). Together these data indicate the participation of pannexin  
371 channels in  $\text{Ca}^{2+}$  mobilization.

372

373 **Fig 6. Pannexin1 facilitates the propagation of  $\text{Ca}^{2+}$  mobilizations when purinergic receptors are activated.**

374 (A) Representative graphs of percent cells activated over time and cluster number when cells were preincubated  
375 with 100  $\mu\text{M}$  10Panx inhibitory peptide or scrambled peptide control prior to stimulation. (n=4). (B) Event  
376 probability values of cells preincubated with either 10Panx or Scrambled Panx control group and activated with  
377 either BzATP or UTP. Data are mean  $\pm$  SEM and were analyzed with a two-tailed unpaired t-test. 10Panx  
378 significantly lowered cell-cell communication if cells were stimulated with P2X7 (\*\* $p < 0.009$ ), while



379 communication was unaffected when stimulated with UTP (ns, n=4).

380

381 To understand the role of ion channels in wound healing, the localization of pannexin1 (Fig 7A, B;  
382 yellow) was examined in control and wounded conditions in vitro and in tissue. Pannexin1 was localized at the  
383 intercellular space of confluent unwounded epithelial cells in culture and 30 minutes after wounding (Fig 7A; \*  
384 indicates wound), it was detected also at the leading edge of the wound. However, by two hours it was prominent  
385 along the wound (arrows). In corresponding unwounded mouse corneal tissue (Fig 7B; arrowheads), pannexin1  
386 localization was similar to the confluent cells (Fig 7A. Within two hours after wounding, pannexin1 was punctate  
387 and present for several cells back from the leading edge of the wound, and by four hours the localization was  
388 prominent (Fig 7B, arrows). This change in pannexin1 localization may explain why the sustained  $Ca^{2+}$   
389 mobilizations after injury were present predominantly in cells closest to the wound edge (Figs. 1,3). Therefore,  
390 cells were incubated in the presence or absence of 10Panx prior to a scratch wound and the event probability  
391 analyses were applied to the videos and cells at the LE were analyzed (Fig 7C, D). Cells treated with 10Panx had  
392 fewer detected  $Ca^{2+}$  events compared to Ctrl (Fig 7C), resulting in significantly lower average event probability  
393 values in the 10Panx-treated group (Fig 7D; \*\* $p < 0.01$ ). These results led us to hypothesize that pannexin  
394 inhibition would also affect cell migration and wound closure. To study this, we used long-term live cell imaging  
395 of cells preincubated with SiR actin Spirochrome to examine cell migration and wound closure in the presence of  
396 10Panx and scrambled control peptide (Fig 8). The cell traces of the epithelial cells obtained from the migration  
397 videos demonstrated that 10Panx inhibited wound closure rate and altered cell migration (Fig 8A, B, C; S5 and S6  
398 Movies). The individual cells revealed different trajectories at the LE compared to those BFLE (S5 and S6  
399 Movies). As shown in Figure 8B, the rate of closure was initially faster in the 10Panx group (red) but over time,  
400 the control group's wound closure rate increased while the inhibitor group stagnated, resulting in delayed wound  
401 closure for the 10Panx group (Fig 8B). The individual trajectories were analyzed and the data was organized and  
402 presented as two cell groups, LE and BFLE cells (Fig 8C). The LE cells in both groups generally moved in the  
403 direction of the wound (Fig 8C), while the BFLE cells in the control wounds moved in the direction of the wound,  
404 the majority of the cells pretreated with 10Panx did not move in the forward direction and instead moved laterally.

405 These findings support our hypothesis that pannexin channels are crucial players in sustained  $\text{Ca}^{2+}$  mobilization  
406 and cell migration in corneal epithelial cells.

407

408 **Fig 7. Pannexin1 localization is detected at wound edge during healing.** (A) Representative confocal  
409 immunofluorescence images of cultured cells stained for pannexin1 localization (yellow, including arrowheads)  
410 and counterstained with rhodamine phalloidin (red). Pannexin1 is concentrated adjacent to the leading edge of the  
411 wound. Scale bar = 23  $\mu\text{m}$ . (n=3). (B) Representative confocal immunofluorescence images of basal corneal  
412 epithelium stained for pannexin1 (yellow, including arrows) and counterstained for rhodamine phalloidin (red).  
413 After wounding (2 and 4 hours) the pannexin1 concentrated towards the leading edge of the wound. An asterisk  
414 indicates the leading edge of migrating epithelium. Scale bar = 18.5  $\mu\text{m}$ . (n=3). (C)  $\text{Ca}^{2+}$  mobilizations are  
415 represented over time in event charts of LE and BFLE cells 10 minutes after wounding, with cells preincubated  
416 with inhibitory peptide 10Panx or scrambled peptide control (Ctrl) (n=3). (D) Event probability values for LE  
417 cells after wounding for both treated and Ctrl groups. Data are mean  $\pm$  SEM and were analyzed with a one-way  
418 ANOVA with the Tukey's multiple comparisons test (\*\*p<0.01, n=3).

419

420 **Fig 8. Inhibition of pannexin channels affect cell migration and wound healing.** (A) Live-cell imaging of the  
421 wound edge of cells preincubated with SiR-Actin Spirochrome (in grayscale) to determine cell migration over a  
422 16 hour period. Scale bar = 66  $\mu\text{m}$ . Traces of the wound area and 8 random cells in the field were drawn over time  
423 to observe the rate of cell migration and wound closure for the experimental and control conditions. Colors reflect  
424 time and are indicated by time wedge (n=3). (B) Representative percent wound closure graph of cells  
425 preincubated with 10Panx or Panx scrambled peptide control over time (n=3). (C) Representative cell migration  
426 trajectory diagrams of of LE and BFLE cells preincubated in either 10Panx or Panx scrambled peptide control.  
427 Each line represents the migration path of a single cell plotted from a common origin. Scale bar = 20  $\mu\text{m}$ .

428

## 429 **Sustained Ca<sup>2+</sup> mobilizations are detected in ex vivo models of the cornea**

430           Previously, work on Ca<sup>2+</sup> mobilizations has been performed primarily on in vitro corneal models [2, 10,  
431 21]. The next logical step is to confirm the presence of the sustained mobilizations in animal models. Therefore,  
432 we examined if treatment with an agonist would induce a sustained Ca<sup>2+</sup> response in the mouse cornea. Live-  
433 imaging performed after the eyes were preincubated in Fluo-3AM and CellMask™ (See Methods). Use of the  
434 CellMask™ (red) allowed for imaging of specific layers of cells. Images are not displayed for the first 10 minutes  
435 after the stimulation because of the noise generated by the initial transient wave as described previously(Fig 1).  
436 When corneal epithelial cells were stimulated with ATP, the basal cells exhibited sustained Ca<sup>2+</sup> mobilizations  
437 (Fig 9A, S7 Movie) and these events were examined using MATLAB analyses to generate the event kymograph  
438 and detected events (Fig 9B). The results demonstrate that it is feasible in the future to apply our image analyses  
439 on corneas with different pathologies and conditions.

440

### 441 **Fig 9. Ca<sup>2+</sup> mobilizations are present in ex vivo organ cultures after stimulation with ATP. (A)**

442 Representative images of Ca<sup>2+</sup> mobilizations in mouse corneal epithelium (white arrowheads) Similar to in vitro  
443 experiments, images were not recorded until 10 minutes after addition of agonist. Scale bar = 15 μm. (n=2). (B)

444 Representative kymograph of Ca<sup>2+</sup> mobilizations and graph representing detected events after stimulation.

445

## 446 **Discussion**

447           While the importance of epithelial sheet migration is well recognized, there is a lack of understanding in  
448 the role of communication that occurs between cells after injury [26]. One way of examining how epithelial cells  
449 move is to evaluate the dynamic communication that occurs after injury and understand how it is coordinated and  
450 this can be examined by evaluating the role of Ca<sup>2+</sup> signaling in orchestrating cell migration and wound repair.

451

452 This study examined the role of the sustained  $\text{Ca}^{2+}$  mobilizations that were generated either after an  
453 epithelial injury or treatment with an agonist, and that lasted for a period of several hours. Previously we showed  
454 that an initial transient response occurred with injury and proposed that it mediated downstream signaling events  
455 by altering phosphorylation of focal adhesion and adaptor proteins in a phosphoproteomic study [2, 7].  
456 Furthermore, knocking down certain purinergic receptors confirmed that this family of receptors did mediate the  
457 response [7]. In our current experiments we demonstrated that neighboring cells display synchronous  
458 mobilizations at the wound edge, which decreased over time and distance from the wound edge. Sustained  $\text{Ca}^{2+}$   
459 mobilizations are not limited to injury and have been reported in a number of developmental systems. These  
460 events or mobilizations were hypothesized to guide cell migration in zebrafish and modulate changes in IP3-  
461 mediated  $\text{Ca}^{2+}$  release from an oscillatory to a tonic mode [27-28]. In addition, they were detected during status  
462 epilepticus where  $\text{Ca}^{2+}$  waves continue for extended time periods [29]. Furthermore, still other investigators  
463 proposed that short flickers of  $\text{Ca}^{2+}$  may mediate the directionality of cell migration [30].

464

465 To examine the response, we used several approaches to analyze  $\text{Ca}^{2+}$  mobilization and cell  
466 communication. Experiments where apyrase, an ectonucleotidase, was added prior to the sustained  $\text{Ca}^{2+}$   
467 mobilizations demonstrated that extracellular ATP was required. Since this  $\text{Ca}^{2+}$  response required extracellular  
468 ATP, we examined the potential role of purinoreceptors in the sustained response as corneal epithelial cells  
469 express P2X7 and P2Y2 and both have been shown to play a role in cell migration [7, 10]. The sustained injury-  
470 induced response was abrogated in the presence of competitive inhibitors to these receptors. While it is possible  
471 that the EGF receptor may mediate these features of cell-communication, it in of itself had a negligible effect. The  
472 differences in communication, frequency and intensity are similar to events found in development [31]. These  
473 similarities are not unexpected as wound repair or directed migration after an injury may have a number of stimuli  
474 that are similar to developing systems.

475

476 To quantify the response, we developed image processing techniques to monitor the cells and examine

477 their interactions through percent of active cells, cluster number, and probability event values. These tools were  
478 developed to analyze the response to agonist stimulation and then applied to the wound response. For example a  
479 qualitative assessment of the response to the agonist UTP indicated that the majority of the cells appeared to be in  
480 an “on or off state”, while in response to BzATP there were regions of high activity and regions of low activity.  
481 A quantitative analysis verified that the  $\text{Ca}^{2+}$  response to BzATP elicited a lower percent of active cells and  
482 cluster number compared to UTP. However, the sustained  $\text{Ca}^{2+}$  mobilization in response to BzATP, while less  
483 active overall compared to UTP, exhibited a more coordinated pattern of cell-cell communication as demonstrated  
484 by higher event probabilities. Additional experiments performed with competitive inhibitors of the P2X7 or P2Y2  
485 receptors revealed that the  $\text{Ca}^{2+}$  event probabilities decreased compared to their respective agonist controls. These  
486 indicated that the receptor most likely responsible for cell-cell communication was the P2X7 receptor.

487

488 We provide evidence that the sustained  $\text{Ca}^{2+}$  mobilizations along the wound edge between cells are  
489 critical for the onset of cell motility. Mobilizations between cells near the wound edge were correlated with a  
490 change in cell shape when cells were co-stained with CellMask™ and Fluo-3AM and these were supported by  
491 analyses revealing significant differences in event probabilities between the LE and BFLE groups, with LE cells  
492 having higher probability values than the BFLE cells. Interestingly, the event probability values of LE cells were  
493 similar to those when cells were stimulated with BzATP, suggesting that the P2X7 receptor may be involved in  
494 the wound healing response induced by the LE cells. This response could explain how injured cells coordinate  
495 themselves for collective migration to close the wound and is supported by studies demonstrating the transient  
496 localization of P2X7 at the wound edge [10].

497

498 The coordinated activity in the  $\text{Ca}^{2+}$  response to BzATP may be explained in part by the fact that the  
499 P2X7 receptor is a channel that allows for ATP transport in and out of cells, resulting in a positive feedback by  
500 allowing the cells at the leading edge to function as mechanically coupled yet electrochemically isolated units  
501 [32]. Preliminary experiments revealed that thapsigargin, an IP3 mediated inhibitor, diminished ruffling at the

502 edge and these were associated with a change in  $\text{Ca}^{2+}$  mobilization [20]. Evidence from other cell systems  
503 suggests the presence of a feed-forward system where ATP could move through pannexin channels and activate  
504 P2X7 receptors [14]. This suggests that there is a continuous release of ATP along the wound margin developing  
505 a chemotactic gradient for the migrating cells that is associated with the sustained  $\text{Ca}^{2+}$  mobilizations. Previously  
506 investigators have demonstrated that the ATP released by neutrophils acts as a chemoattractant [15-17].

507

508         Although the activity of the sustained  $\text{Ca}^{2+}$  mobilizations is cell density dependent, the probability that  
509 cell-cell communication propagated through gap junctions was not reduced with alpha-glycyrrhetic acid, a  
510 specific inhibitor of gap junctions, that disrupts the junctions. Another candidate channel protein, pannexin, may  
511 be the more likely candidate [3, 24]. Its role is demonstrated in dendritic cells pannexin1 and P2X7 where both  
512 proteins play a role in cell migration during injury [18]. Using a specific pannexin channel inhibitor, we  
513 demonstrated that cell migration rate, cell behavior during migration and  $\text{Ca}^{2+}$  mobilization were altered when  
514 pannexin1 was inhibited. Studies where communication or event probability was assessed after cells were  
515 incubated in the presence or absence of 10Panx and then stimulated with UTP or BzATP revealed that the  
516 probability of communication was impeded significantly when cells were activated with BzATP. Our current  
517 proposed model for  $\text{Ca}^{2+}$  mobilization propagation is localized release of ATP through pannexin channels  
518 activating purinergic receptors in neighboring epithelial cells. Specifically in our epithelial cells, ATP remained 6-  
519 to 7-fold higher after injury compared to the near constant basal levels of unwounded control cells. These indicate  
520 that there may be an overall greater release than degradation of ATP as it may be secreted constantly by migrating  
521 cells. These concur with the observation of cells at the leading edge where mobilization of  $\text{Ca}^{2+}$  was associated  
522 with rapid changes in cell morphology and migration.

523

524         Study of the communication between cells provides insight into the mechanisms of wound repair in  
525 control and diseased conditions. The epithelial injury model and the quantitative processing provides a valuable  
526 system to investigate how cells communicate in response to specific receptors. This model can be used to identify

527 therapeutic targets and test strategies in the cornea and in other tissues to modulate the collective cell migration in  
528 treating and preventing disease progression.

529

## 530 **Acknowledgements**

531 We thank Drs. Brigitte Ritter, Dr. Matthew Nugent, and Gregory Teicher for critical and challenging  
532 discussions. We thank Ms Audrey Hutcheon for editorial comments.

## 533 **References**

- 534 1. Barrios J, Patel KR, Aven L, Achey R, Minns MS, Lee Y, et al. Early life allergen-induced mucus  
535 overproduction requires augmented neural stimulation of pulmonary neuroendocrine cell secretion. The  
536 FASEB Journal. 2017 May 31;31(9):4117–28.
- 537 2. Klepeis VE, Cornell-Bell A, Trinkaus-Randall V. Growth factors but not gap junctions play a role in  
538 injury-induced Ca<sup>2+</sup> waves in epithelial cells. Journal of Cell Science. 2001 Dec 1;114(23):4185–95.
- 539 3. Lu W, Hu H, Sévigny J, Gabelt BT, Kaufman PL, Johnson EC, et al. Rat, mouse, and primate models of  
540 chronic glaucoma show sustained elevation of extracellular atp and altered purinergic signaling in the  
541 posterior eye. Invest Ophthalmol Vis Sci. 2015 May 1;56(5):3075–83.
- 542 4. Adinolfi E. New intriguing roles of ATP and its receptors in promoting tumor metastasis. Purinergic  
543 Signalling. 2013 Dec 1;9(4):487–90.
- 544 5. Boucher I, Yang L, Mayo C, Klepeis V, Trinkaus-Randall V. Injury and nucleotides induce  
545 phosphorylation of epidermal growth factor receptor: MMP and HB-EGF dependent pathway.  
546 Experimental Eye Research. 2007 Jul 1;85(1):130–41.
- 547 6. Burnstock G. Purinergic mechanosensory transduction and visceral pain. Mol Pain. 2009 Jan 1;5:1744-  
548 8069-5–69.

- 549 7. Kehasse A, Rich CB, Lee A, McComb ME, Costello CE, Trinkaus-Randall V. Epithelial Wounds Induce  
550 Differential Phosphorylation Changes in Response to Purinergic and EGF Receptor Activation. *The*  
551 *American Journal of Pathology*. 2013 Dec 1;183(6):1841–52.
- 552 8. Yin J, Xu K, Zhang J, Kumar A, Yu F-SX. Wound-induced ATP release and EGF receptor activation in  
553 epithelial cells. *Journal of Cell Science*. 2007 Mar 1;120(5):815–25.
- 554 9. Abbracchio MP, Burnstock G. Purinergic Signalling: Pathophysiological Roles. *JpnJPharmacol*.  
555 1998;78(2):113–45.
- 556 10. Minns MS, Teicher G, Rich CB, Trinkaus-Randall V. Purinoreceptor P2X7 Regulation of Ca<sup>2+</sup>  
557 Mobilization and Cytoskeletal Rearrangement Is Required for Corneal Reepithelialization after Injury.  
558 *The American Journal of Pathology*. 2016 Feb 1;186(2):285–96.
- 559 11. Boucher I, Rich C, Lee A, Marcincin M, Trinkaus-Randall V. The P2Y2 receptor mediates the epithelial  
560 injury response and cell migration. *American Journal of Physiology-Cell Physiology*. 2010 Apr  
561 28;299(2):C411–21.
- 562 12. Mankus C, Rich C, Minns M, Trinkaus-Randall V. Corneal Epithelium Expresses a Variant of P2X7  
563 Receptor in Health and Disease. *PLOS ONE*. 2011 Dec 6;6(12):e28541.
- 564 13. Kneer K, Green MB, Meyer J, Rich CB, Minns MS, Trinkaus-Randall V. High fat diet induces pre-type 2  
565 diabetes with regional changes in corneal sensory nerves and altered P2X7 expression and localization.  
566 *Experimental Eye Research*. 2018 Oct 1;175:44–55.
- 567 14. Boudreault F, Grygorczyk R. Cell swelling-induced ATP release is tightly dependent on intracellular  
568 calcium elevations. *J Physiol*. 2004 Dec 1;561(Pt 2):499–513.
- 569 15. Junger WG. Purinergic regulation of neutrophil chemotaxis. *Cell Mol Life Sci*. 2008 Aug 1;65(16):2528–  
570 40.
- 571 16. Chen Y, Bao Y, Zhang J, Woehrle T, Sumi Y, Ledderose S, et al. Inhibition of neutrophils by hypertonic  
572 saline involves pannexin-1, CD39, CD73, and other ectonucleotidases. *Shock*. 2015 Sep;44(3):221–7.
- 573 17. Sumi Y, Woehrle T, Chen Y, Bao Y, Li X, Yao Y, et al. Plasma ATP is required for neutrophil activation  
574 in a mouse sepsis model. *Shock*. 2014 Aug;42(2):142–7.



- 575 18. Sáez PJ, Vargas P, Shoji KF, Harcha PA, Lennon-Duménil A-M, Sáez JC. ATP promotes the fast  
576 migration of dendritic cells through the activity of pannexin 1 channels and P2X7 receptors. *Sci Signal*.  
577 2017 Nov 21;10(506):eaah7107.
- 578 19. Gipson IK, Spurr-Michaud S, Argüeso P, Tisdale A, Ng TF, Russo CL. Mucin gene expression in  
579 immortalized human corneal-limbal and conjunctival epithelial cell lines. *Invest Ophthalmol Vis Sci*.  
580 2003 Jun;44(6):2496–506.
- 581 20. Lee A, Derricks K, Minns M, Ji S, Chi C, Nugent MA, et al. Hypoxia-induced changes in Ca<sup>2+</sup>  
582 mobilization and protein phosphorylation implicated in impaired wound healing. *American Journal of*  
583 *Physiology-Cell Physiology*. 2014 Mar 26;306(10):C972–85.
- 584 21. Weinger I, Klepeis VE, Trinkaus-Randall V. Tri-nucleotide receptors play a critical role in epithelial cell  
585 wound repair. *Purinergic Signalling*. 2005 Sep 1;1(3):281-92.
- 586 22. Derricks KE, Trinkaus-Randall V, Nugent MA. Extracellular matrix stiffness modulates VEGF calcium  
587 signaling in endothelial cells: individual cell and population analysis. *Integr Biol*. 2015 Sep 1;7(9):1011–  
588 25.
- 589 23. Klepeis VE, Weinger I, Kaczmarek E, Trinkaus-Randall V. P2Y receptors play a critical role in epithelial  
590 cell communication and migration. *Journal of Cellular Biochemistry*. 2004 Dec 15;93(6):1115–33.
- 591 24. Romanov RA, Bystrova MF, Rogachevskaya OA, Sadovnikov VB, Shestopalov VI, Kolesnikov SS. The  
592 ATP permeability of pannexin 1 channels in a heterologous system and in mammalian taste cells is  
593 dispensable. *J Cell Sci*. 2012 Nov 15;125(22):5514–23.
- 594 25. Basova LV, Tang X, Umasume T, Gromova A, Zyrianova T, Shmushkovich T, et al. Manipulation of  
595 Panx1 Activity Increases the Engraftment of Transplanted Lacrimal Gland Epithelial Progenitor Cells.  
596 *Invest Ophthalmol Vis Sci*. 2017 Nov 1;58(13):5654–65.
- 597 26. Friedl P, Mayor R. Tuning Collective Cell Migration by Cell–Cell Junction Regulation. *Cold Spring Harb*  
598 *Perspect Biol*. 2017 Apr 1;9(4):a029199.
- 599 27. Chen J, Xia L, Bruchas MR, Solnica-Krezel L. Imaging early embryonic calcium activity with GCaMP6s  
600 transgenic zebrafish. *Developmental Biology*. 2017 Oct 15;430(2):385–96.

- 601 28. Courjaret R, Dib M, Machaca K. Store-Operated Ca<sup>2+</sup> Entry in Oocytes Modulate the Dynamics of IP<sub>3</sub> -  
602 Dependent Ca<sup>2+</sup> Release From Oscillatory to Tonic. *J Cell Physiol*. 2017 May;232(5):1095–103.
- 603 29. Deshpande LS, Blair RE, Phillips KF, DeLorenzo RJ. Role of the calcium plateau in neuronal injury and  
604 behavioral morbidities following organophosphate intoxication. *Ann N Y Acad Sci*. 2016  
605 Jun;1374(1):176–83.
- 606 30. Wei C, Wang X, Chen M, Ouyang K, Song L-S, Cheng H. Calcium flickers steer cell migration. *Nature*.  
607 2009 Feb;457(7231):901–5.
- 608 31. Schneider I, Houston DW, Rebagliati MR, Slusarski DC. Calcium fluxes in dorsal forerunner cells  
609 antagonize  $\beta$ -catenin and alter left-right patterning. *Development*. 2008 Jan 1;135(1):75–84.
- 610 32. Takai E, Tsukimoto M, Harada H, Kojima S. Autocrine signaling via release of ATP and activation of  
611 P2X<sub>7</sub> receptor influences motile activity of human lung cancer cells. *Purinergic Signalling*. 2014 Sep  
612 1;10(3):487–97.
- 613

## 614 **Supporting information**

615 **S1 Fig Representative kymograph of cells at least 2 cell rows away from the wound edge.** Compared to the  
616 kymographs made from cells at the wound edge (LE), the Ca<sup>2+</sup> response showed less intensity. Brackets on the  
617 left and each horizontal line represent activity of a single cell (n=7).

618

619 **S2 Fig Association of P2X<sub>7</sub> and pannexin1 protein in epithelial cells.** HCLE cells were cultured until  
620 confluent, and cross-linking was performed with formaldehyde in situ, as previously described [12]. Each  
621 crosslinked experimental sample (labeled “CL”) and its corresponding control were heated at two different  
622 temperature settings: 65°C (to maintain crosslinks) and 95°C (to disrupt crosslinks). Both CL lanes displayed the  
623 crosslinked P2X<sub>7</sub>+ pannexin1 protein product, with the CL (95°C) lane verifying the composition crosslinked  
624 protein product. (n=3).

625

626 **S1 Movie. Sustained Ca<sup>2+</sup> oscillations detected after scratch-wounding.** Confluent cells were preincubated  
627 with 5  $\mu$ M of Fluo3-AM for 30 minutes. Cells were scratch-wounded and imaged for 2 hours in an environmental  
628 chamber mounted on a Zeiss 880 confocal microscope (10x). Images were taken every 3 seconds, with the movie  
629 at 25 fps. Scale bar = 60 $\mu$ m.

630

631 **S2 Movie. Sustained Ca<sup>2+</sup> oscillations induced by UTP.** Confluent HCLE cells were preincubated with 5 $\mu$ M of  
632 Fluo3-AM for 30 minutes. Cells were stimulated with 25  $\mu$ M UTP and imaged for 45 minutes in an  
633 environmental chamber mounted on a Zeiss 880 confocal microscope (20x). Images were taken every 3 seconds,  
634 with the movie at 25 fps. Scale Bar = 50  $\mu$ m.

635

636 **S3 Movie. Sustained Ca<sup>2+</sup> oscillations induced by BzATP stimulation.** Confluent HCLE cells were  
637 preincubated with 5  $\mu$ M of Fluo3-AM for 30 minutes. Cells were stimulated with 25  $\mu$ M BzATP and imaged for  
638 45 minutes in an environmental chamber mounted on a Zeiss 880 confocal microscope (20x). Images were taken  
639 every 3 seconds, with the movie at 25 fps. Scale Bar = 50  $\mu$ m.

640

641 **S4 Movie. Ca<sup>2+</sup> mobilizations and cell shape.** Confluent HCLE cells were preincubated with 5  $\mu$ M Fluo3-AM  
642 for 30 minutes and CellMask<sup>TM</sup> Deep Red Plasma membrane stain at recommended concentration for 5 minutes.  
643 Cells were scratch-wounded and imaged for 45 minutes in an environmental chamber mounted on a Zeiss 880  
644 confocal microscope (40x oil). Images were taken every 5 seconds, with the movie at 25 fps. Scale Bar = 34  $\mu$ m.

645

646 **S5 Movie. 10Panx significantly attenuates wound closure rate.** Confluent HCLE cells were treated with 100  
647  $\mu$ M 10Panx inhibitory peptide for an hour before being preincubated with 5  $\mu$ M Fluo3-AM for 30 minutes. Cells  
648 were scratch-wounded and imaged for 16 hours in an environmental chamber mounted on a Zeiss 880 confocal  
649 microscope (20x). Images were taken every 5 minutes, with the movie at 50 fps. Scale Bar = 66  $\mu$ m.

650

651 **S6 Movie. Pannexin scrambled peptide does not inhibit rate of wound closure.** Confluent cells were treated  
652 with 100  $\mu\text{M}$  Scrambled Panx control peptide for an hour before being preincubated with 5  $\mu\text{M}$  Fluo3-AM for 30  
653 minutes. Cells were scratch-wounded and imaged for 16 hours in an environmental chamber mounted on a Zeiss  
654 880 confocal microscope (20x). Images were taken every 5 minutes, with the movie at 50 fps. Scale Bar = 66  $\mu\text{m}$ .

655

656 **S7 Movie.  $\text{Ca}^{2+}$  mobilizations in organ culture.** Mouse corneas were preincubated with 15  $\mu\text{M}$  Fluo3-AM for 30  
657 minutes and CellMask™ Deep Red Plasma membrane stain at recommended concentration for 5 minutes. Cells  
658 were scratch-wounded and imaged for at least 15 mins in an environmental chamber mounted on a Zeiss 880  
659 confocal microscope with AIRYSCAN Fast Module (20x). Images were taken every 10 seconds, with the movie  
660 at 25fps. Scale Bar = 16.5  $\mu\text{m}$ .

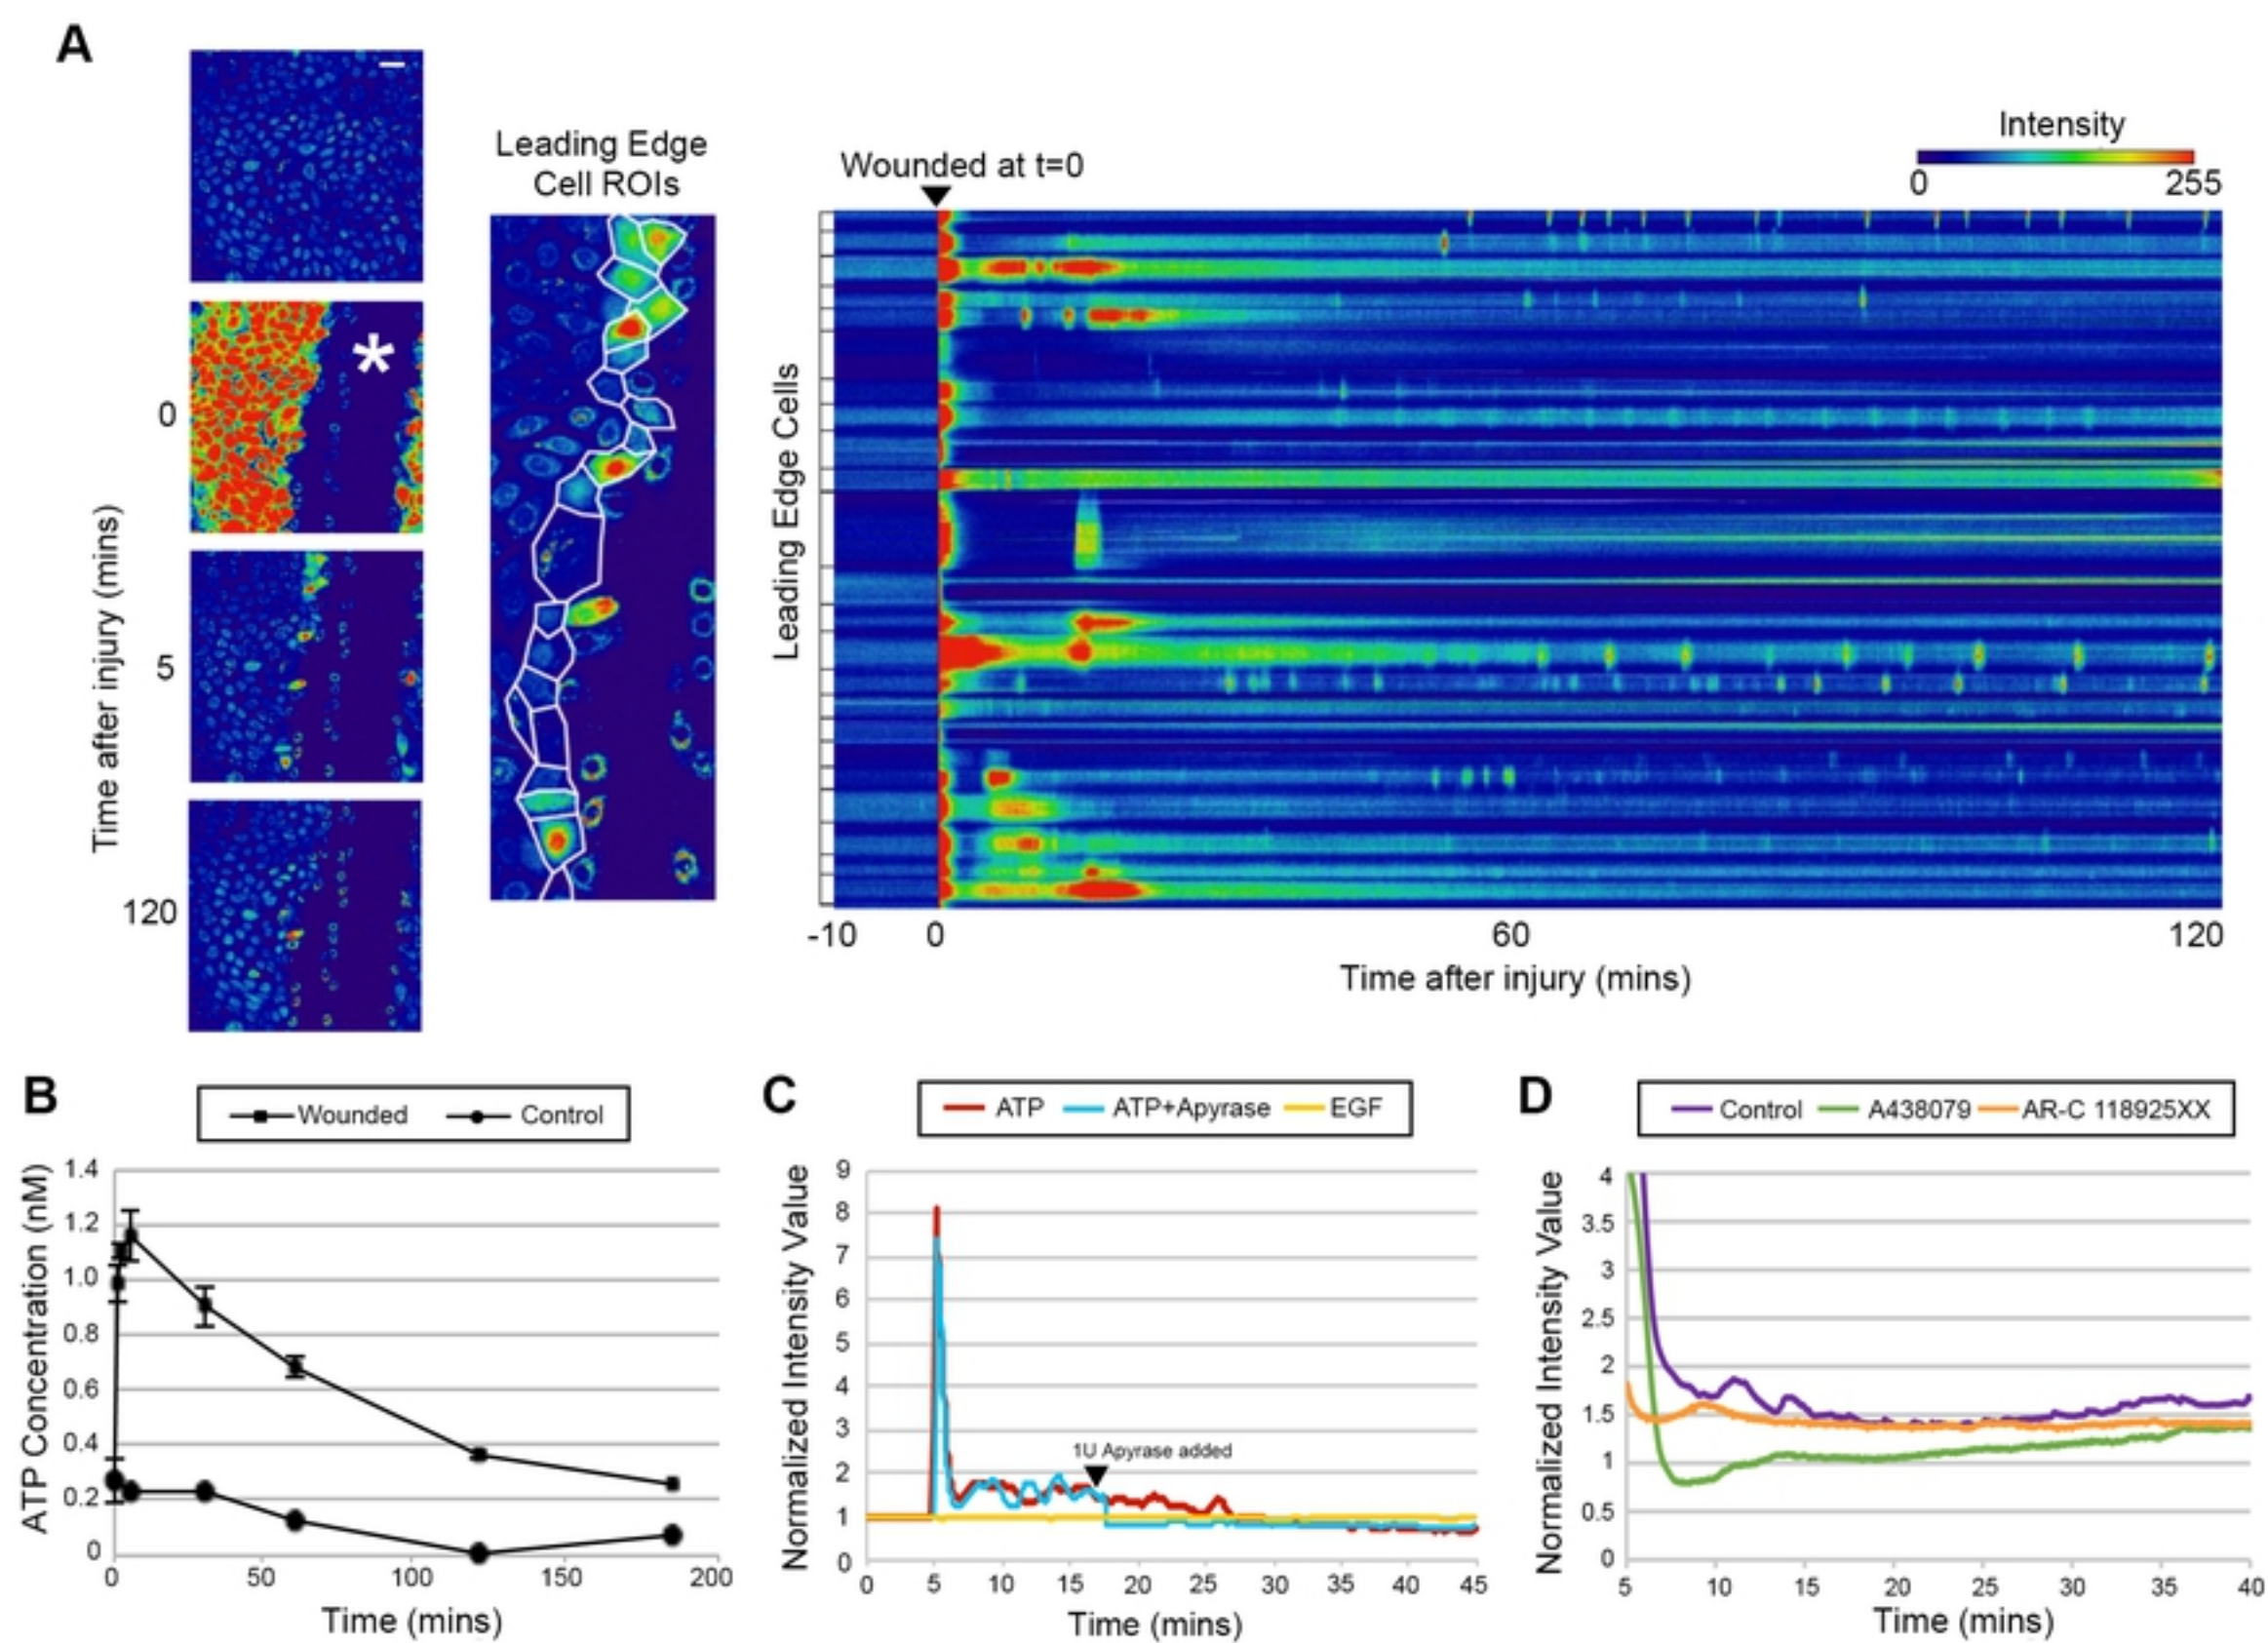

Figure 1



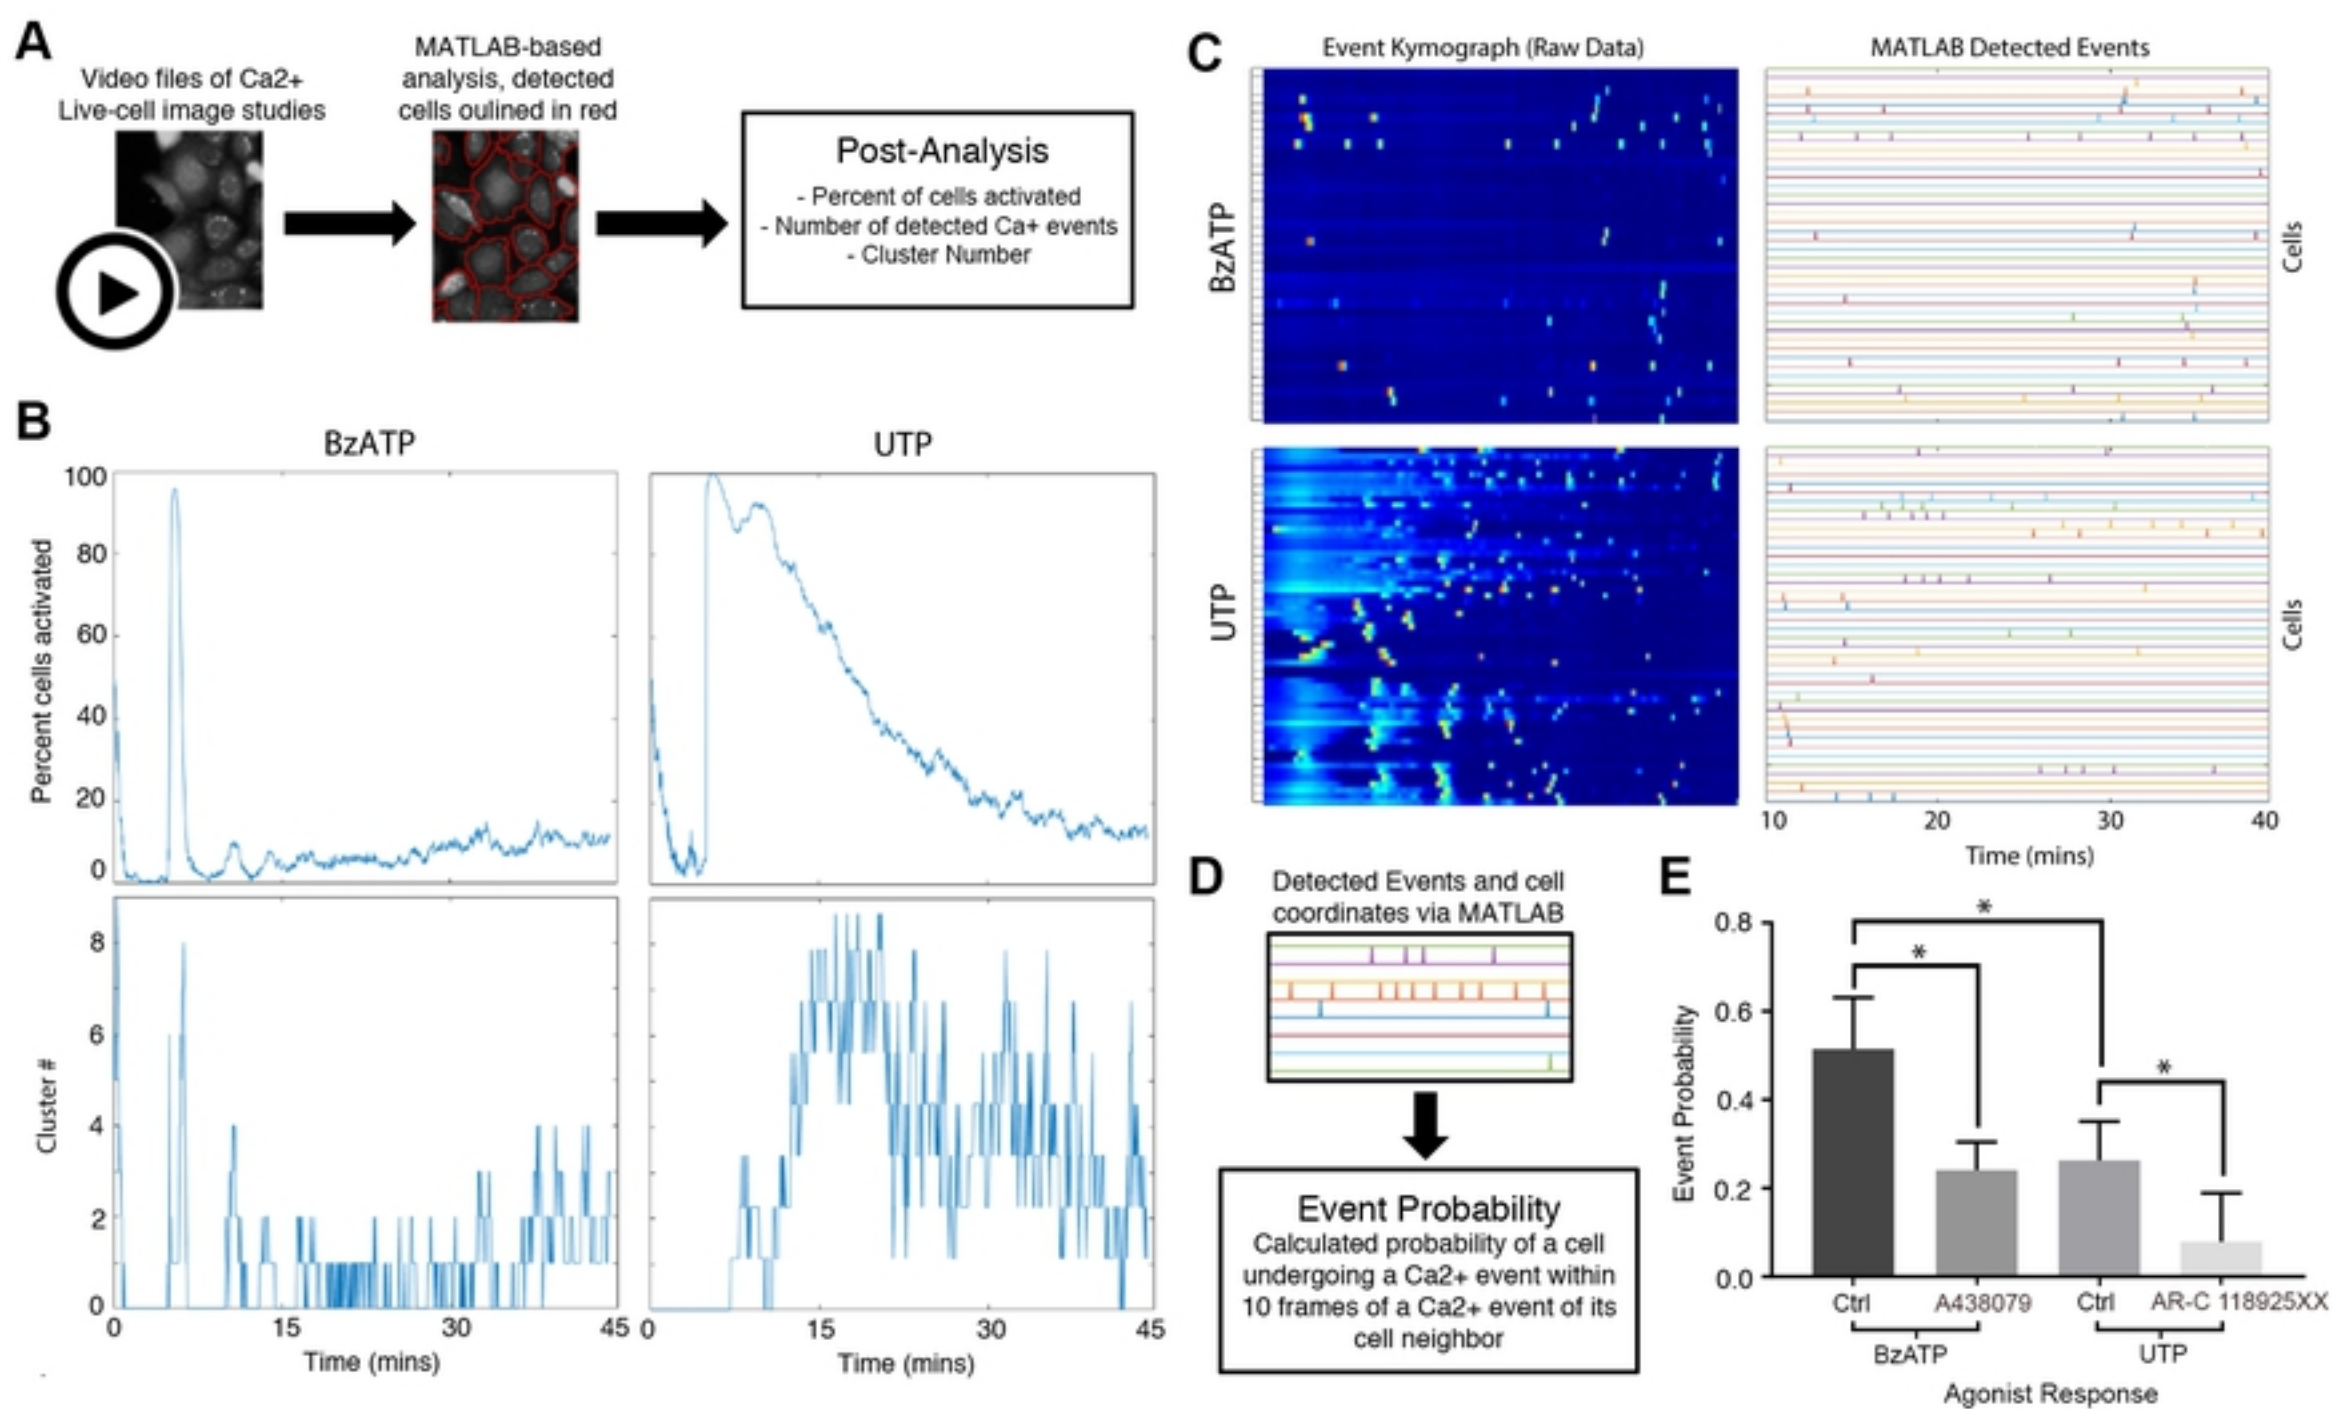

Figure 2

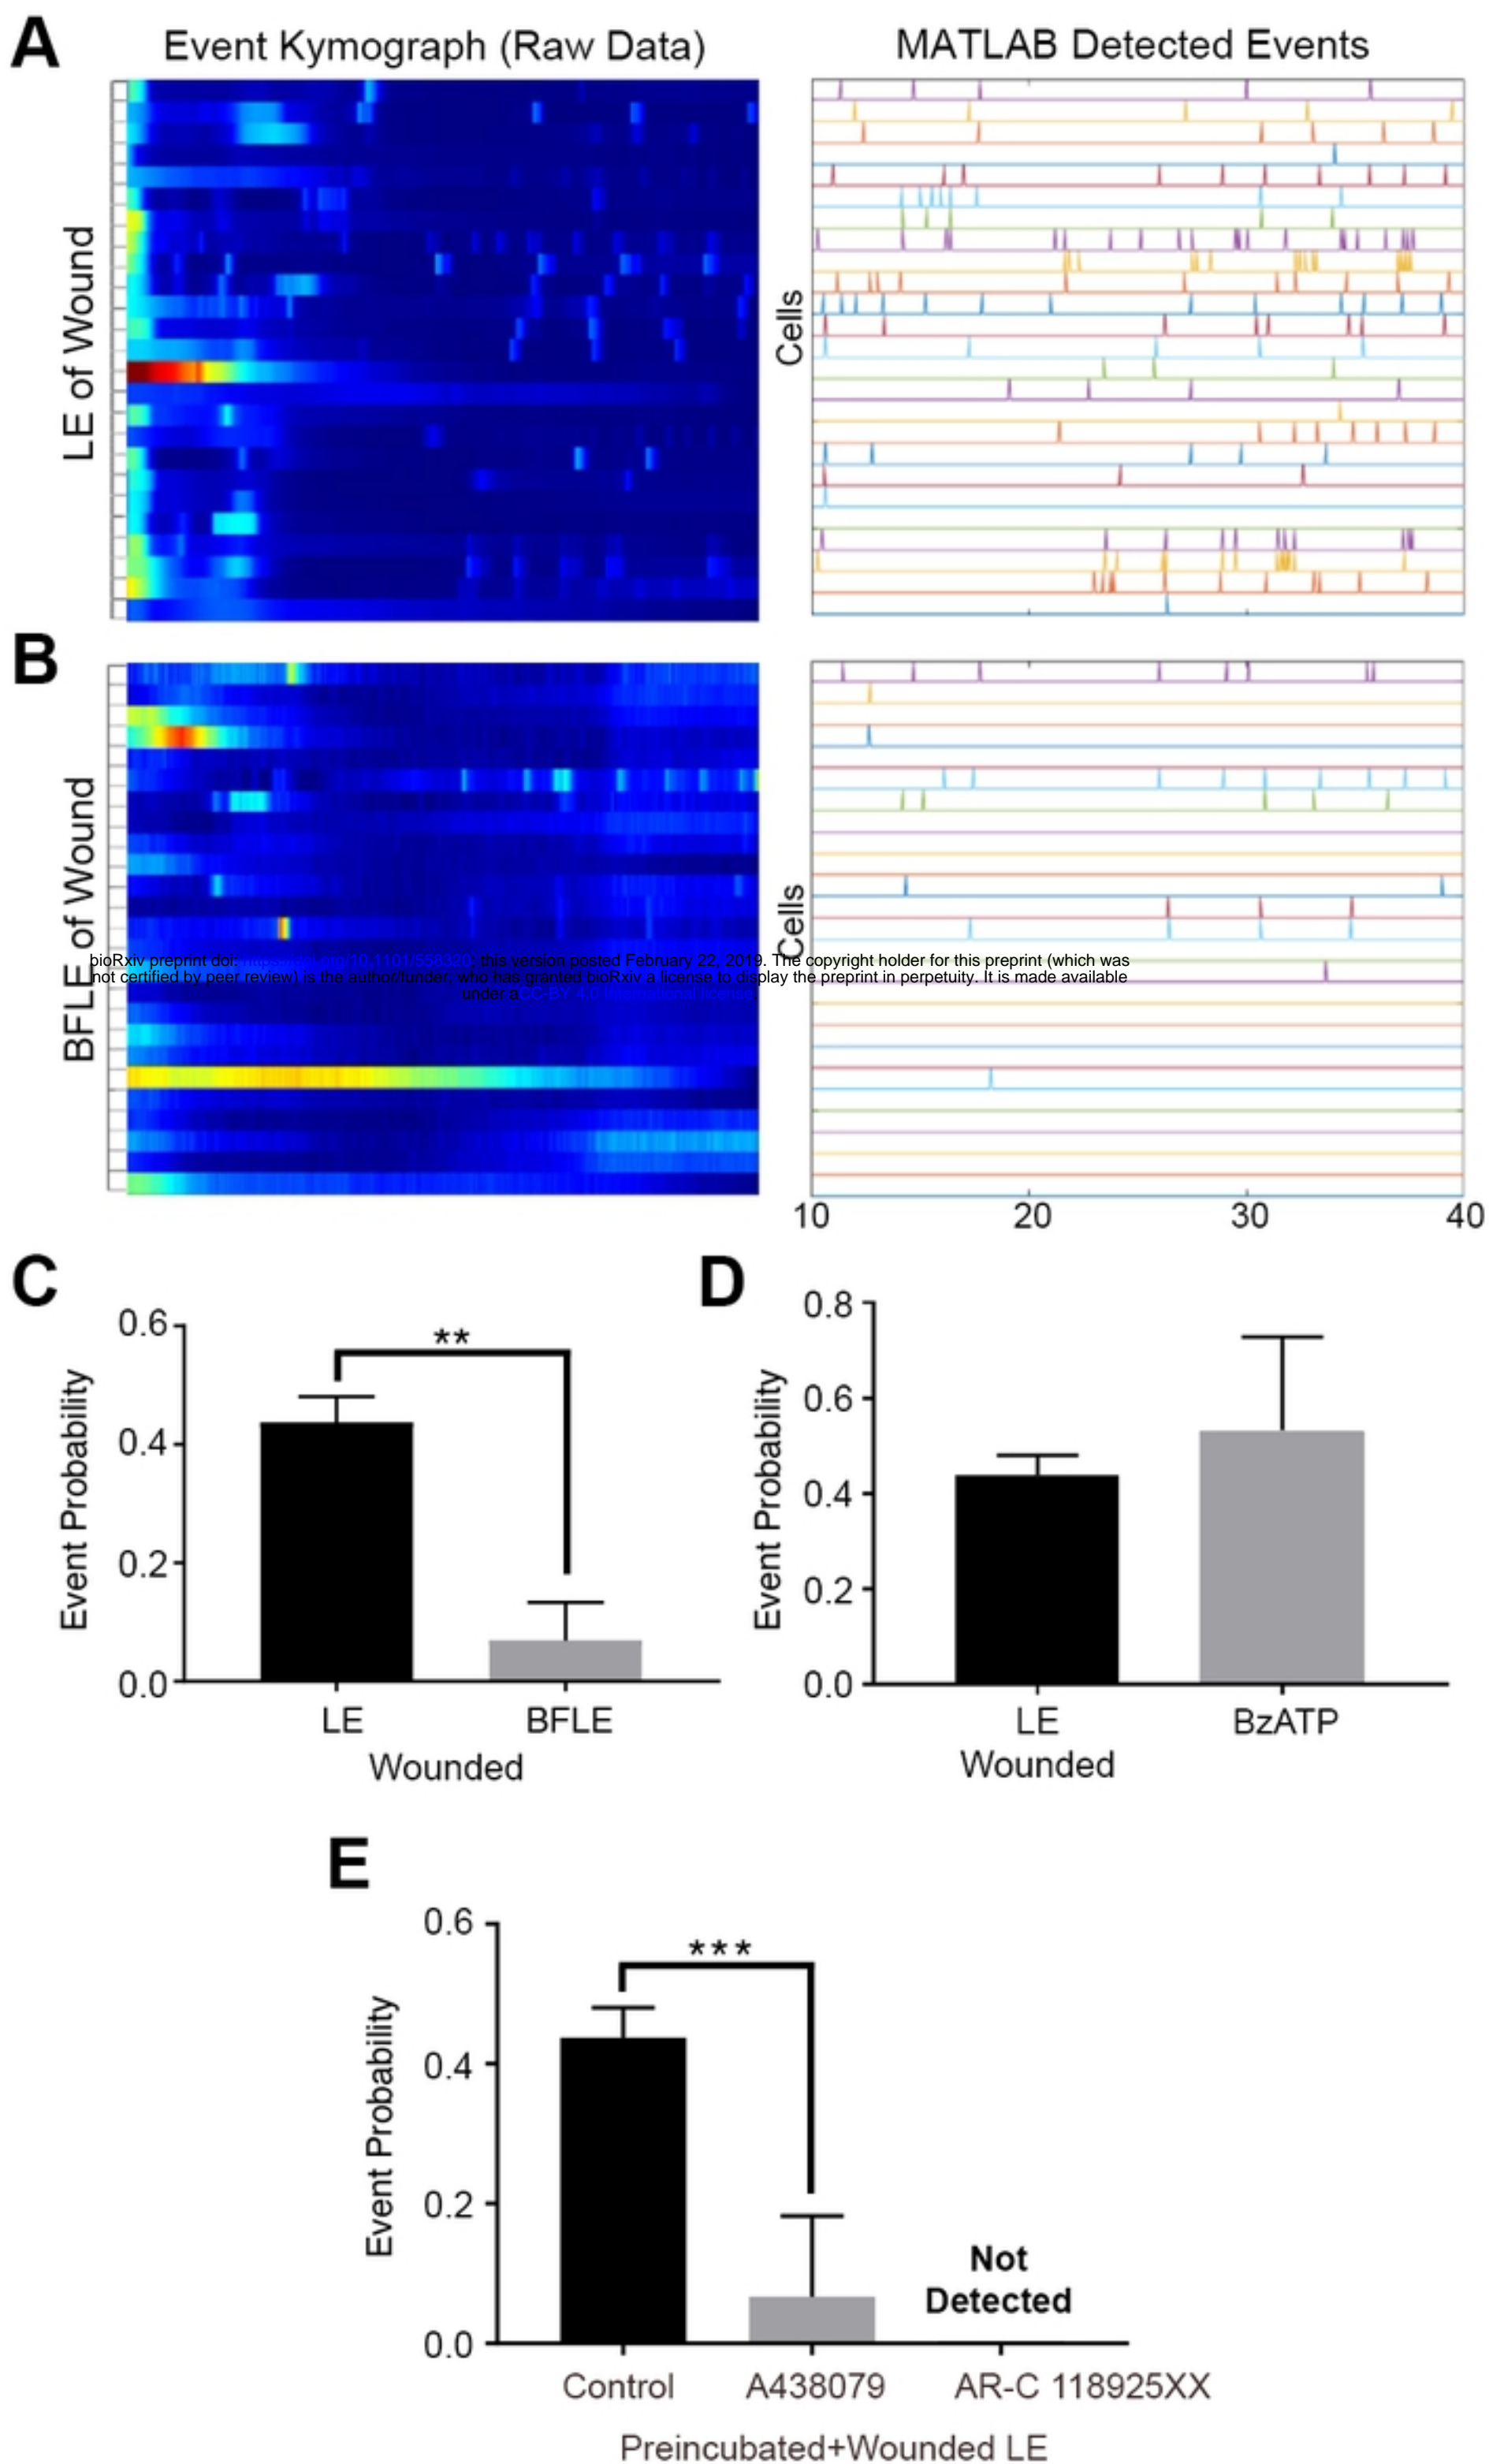

Figure 3



**A**

Time (seconds)

103

143

603

3603

Active Cells

bioRxiv preprint doi: <https://doi.org/10.1101/358320>; this version posted February 22, 2019. The copyright holder for this preprint (which was not certified by peer review) is the author/funder, who has granted bioRxiv a license to display the preprint in perpetuity. It is made available under aCC-BY 4.0 International license.

Inactive Cells

**B**

Active Cells

Inactive Cells

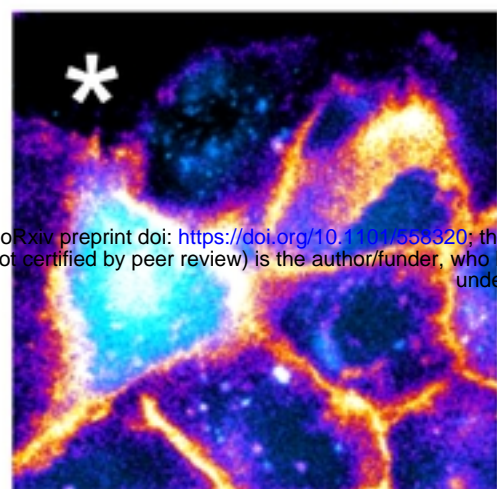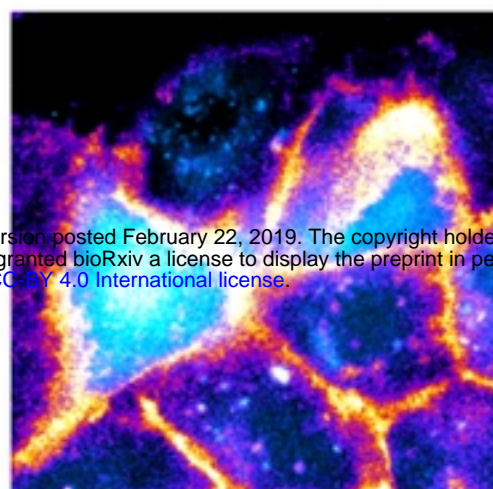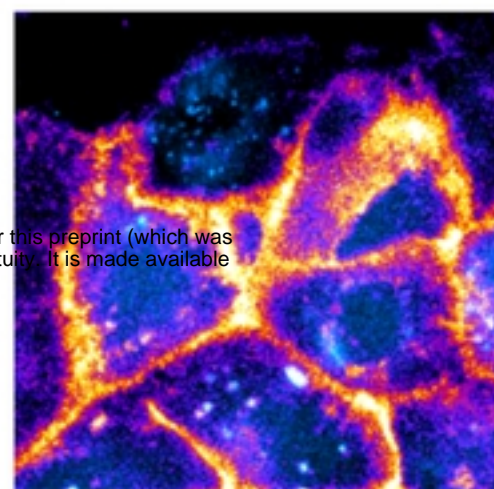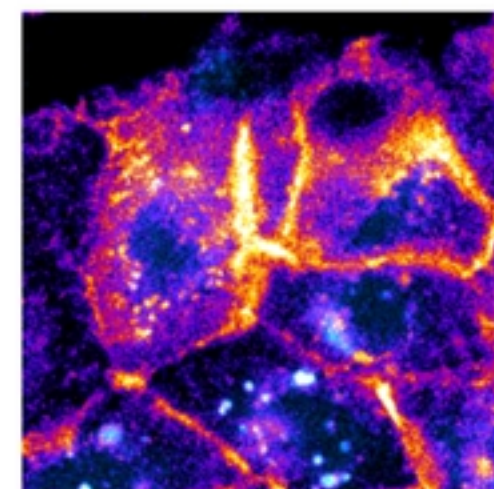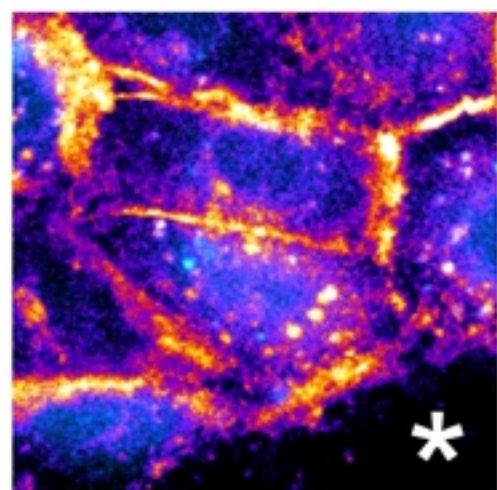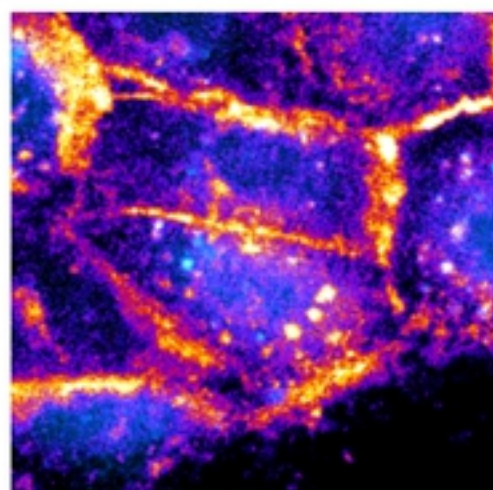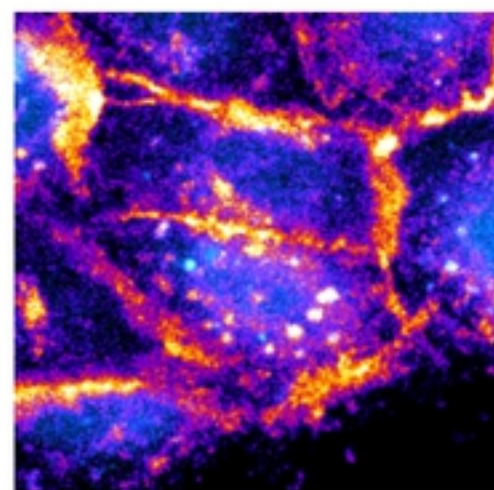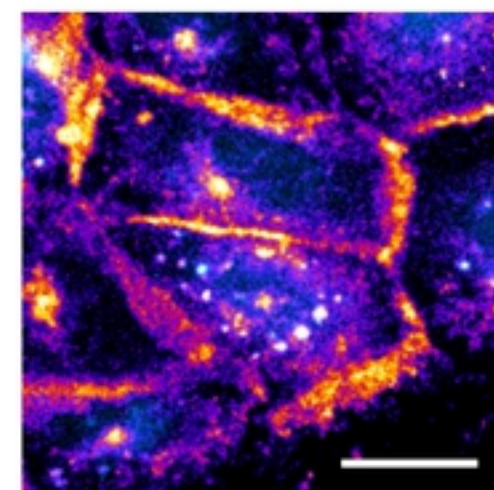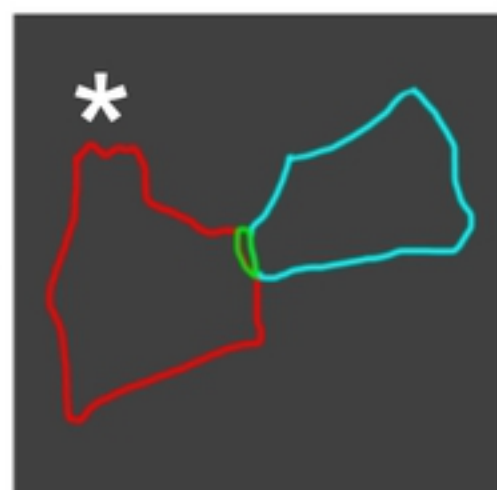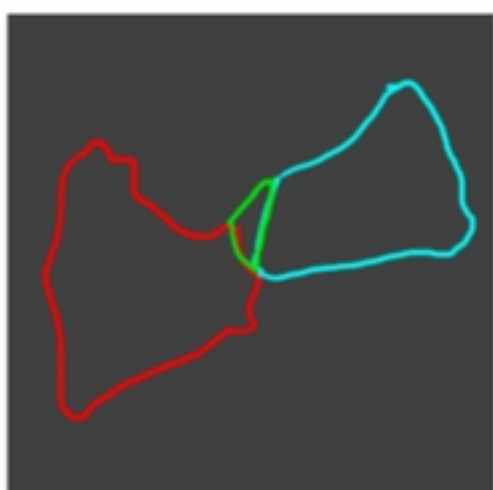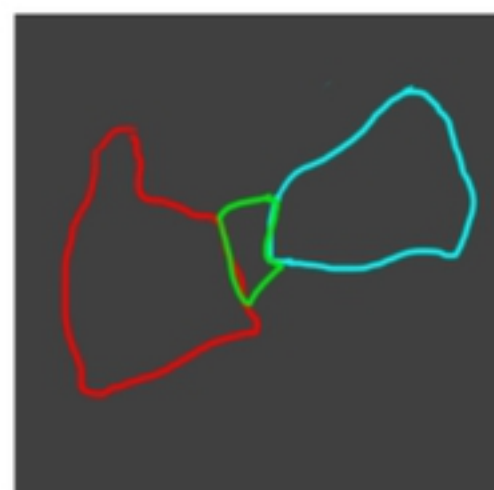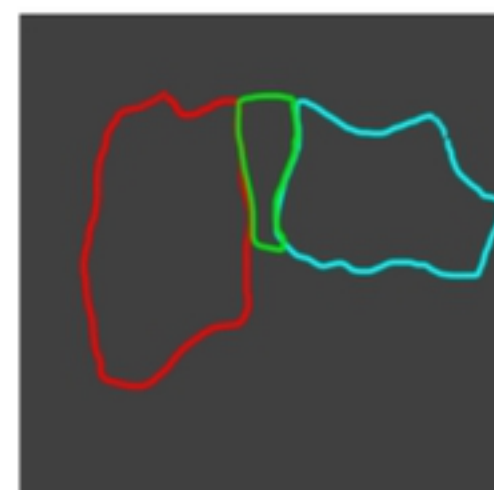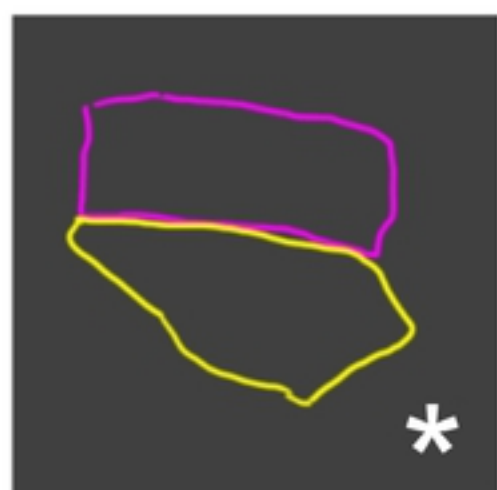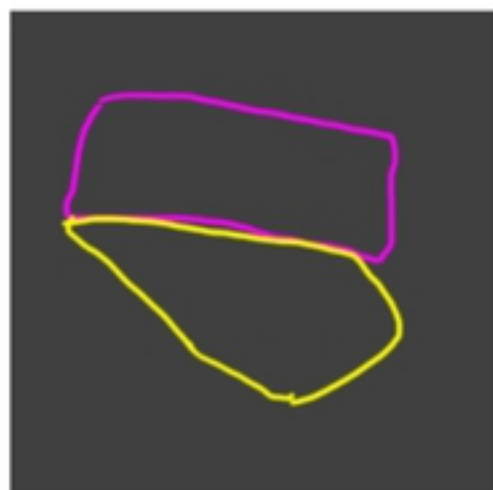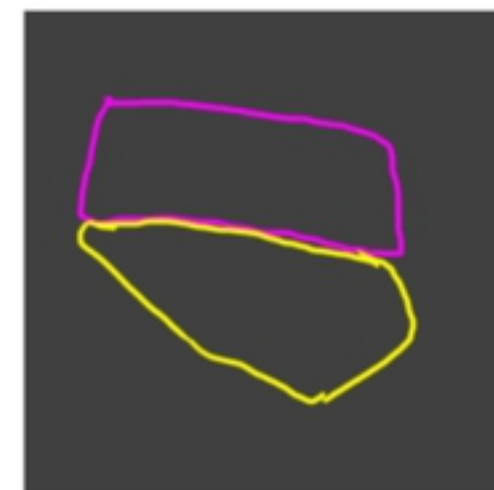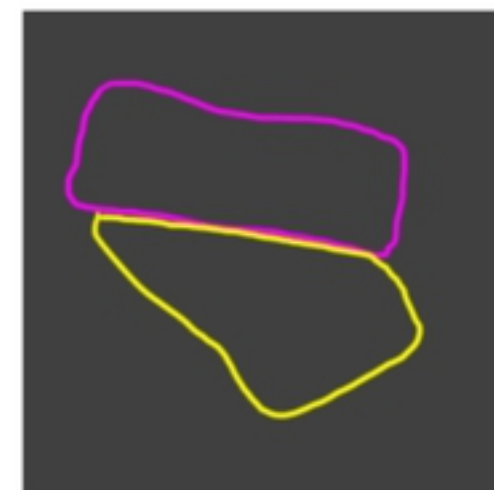

Figure 4



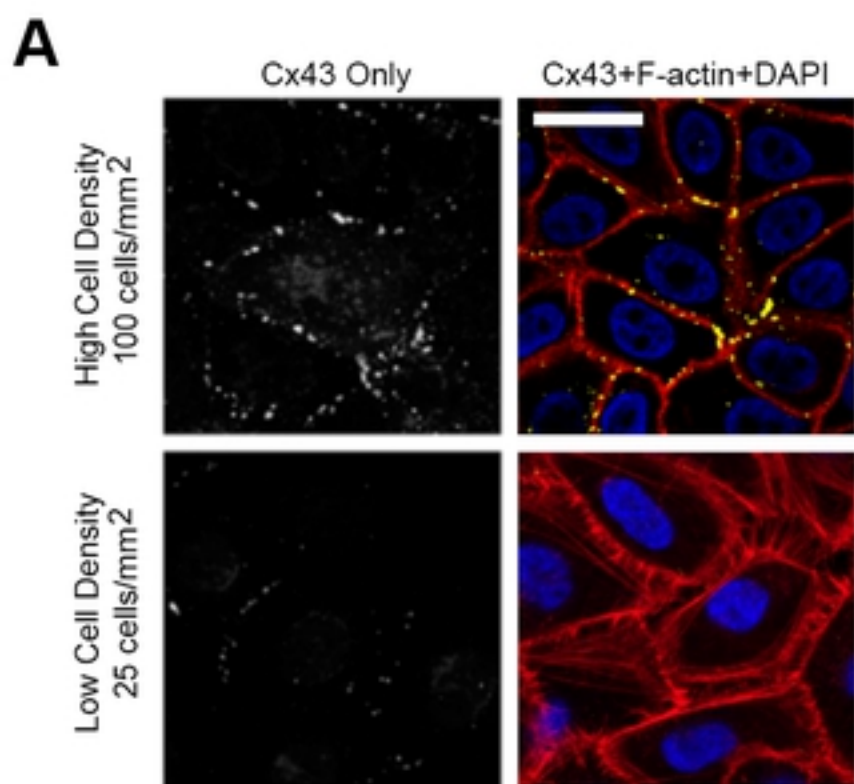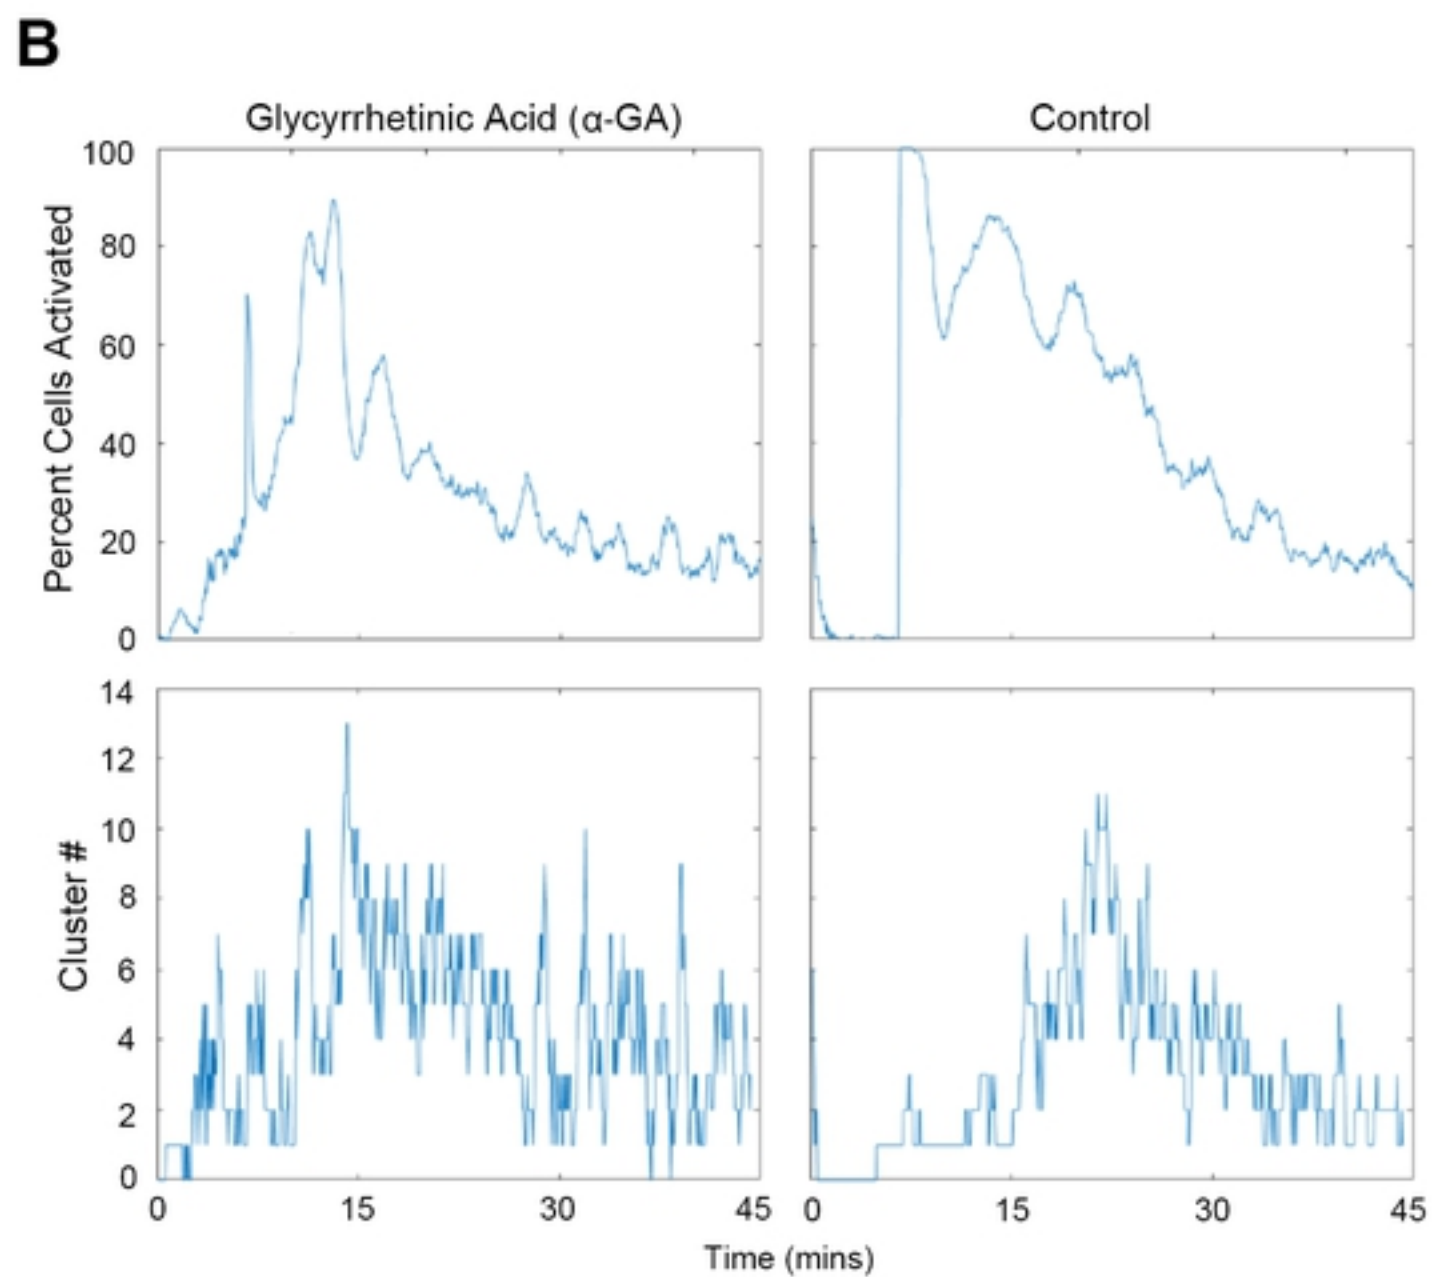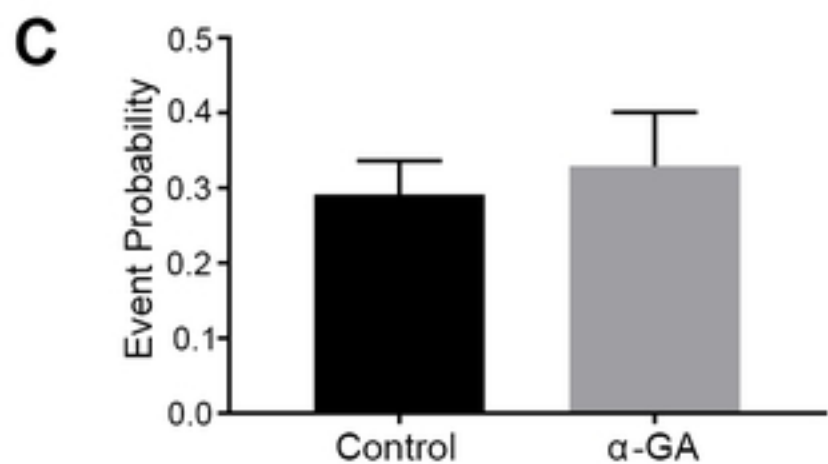

Figure 5

**A**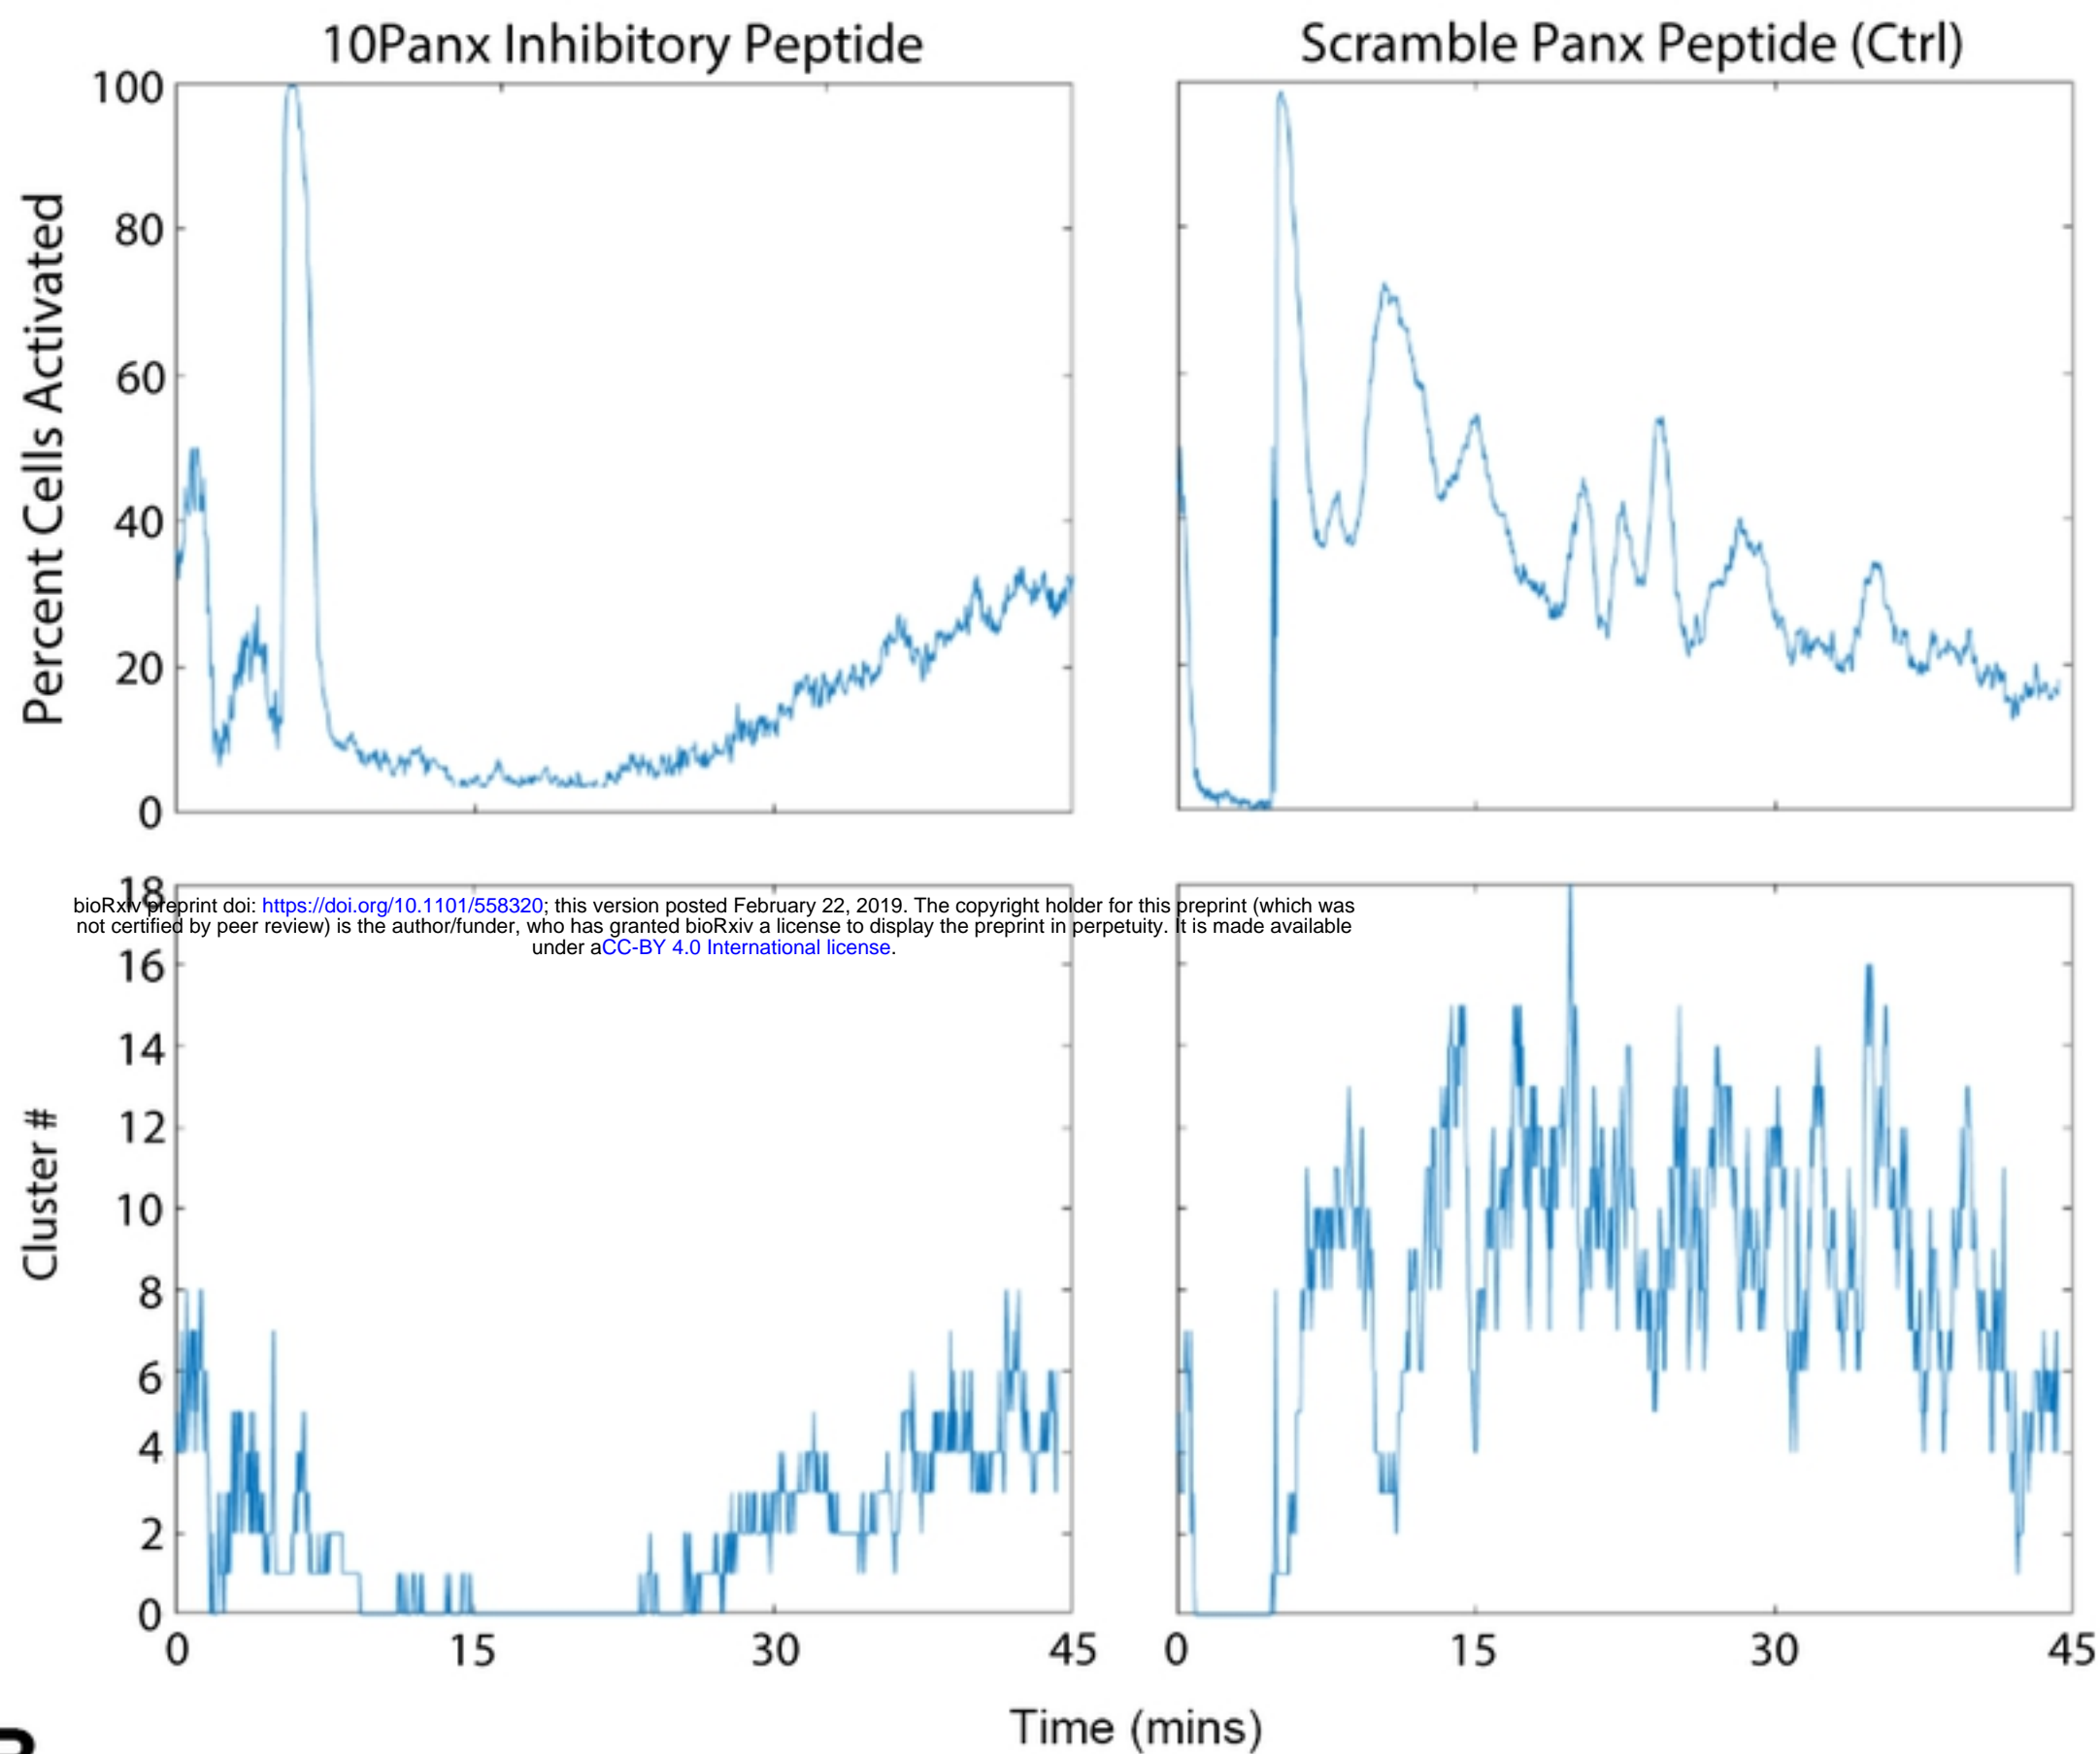**B**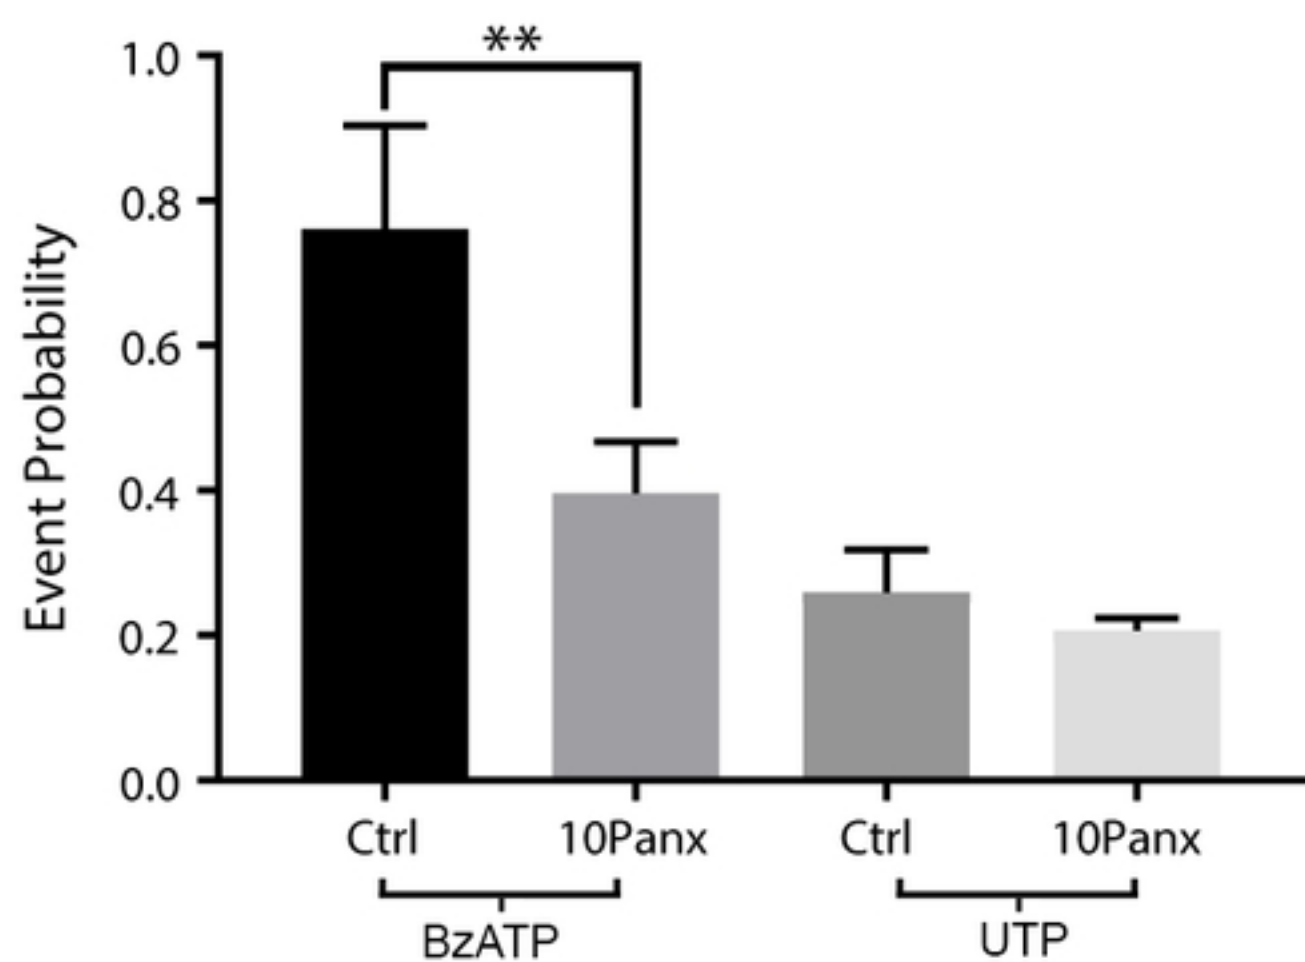

Figure 6

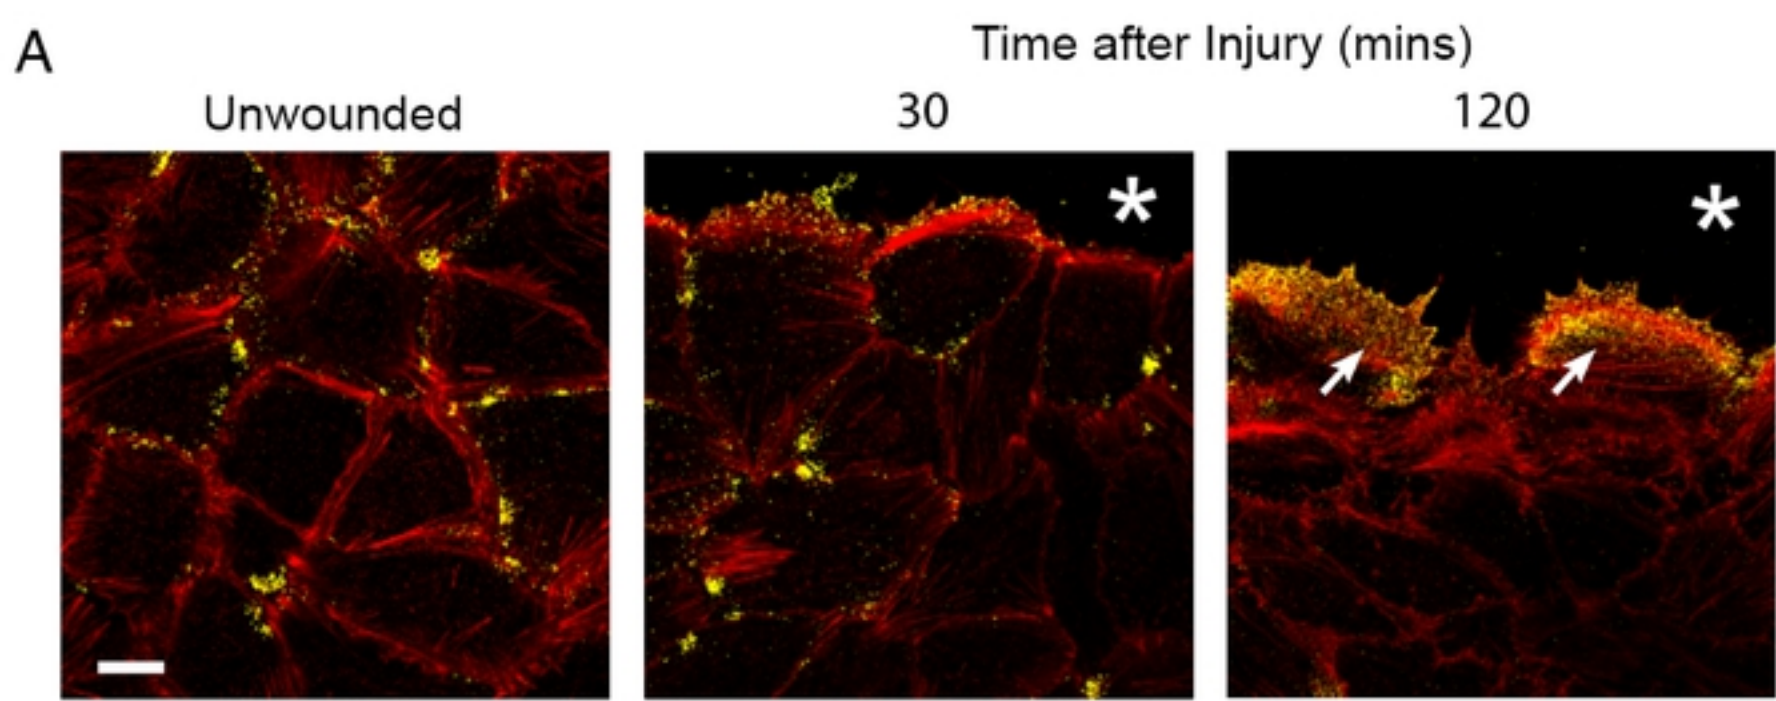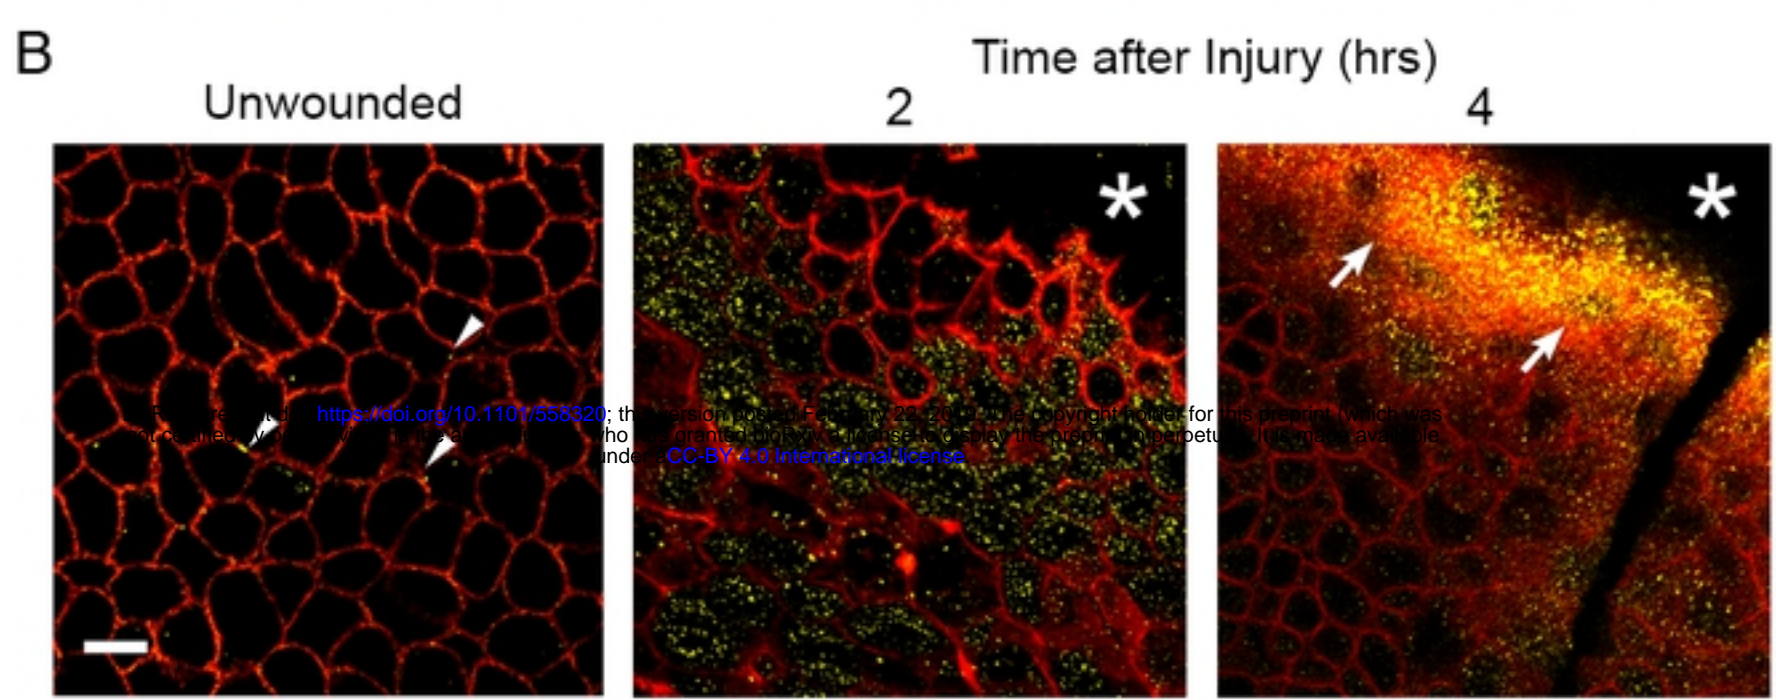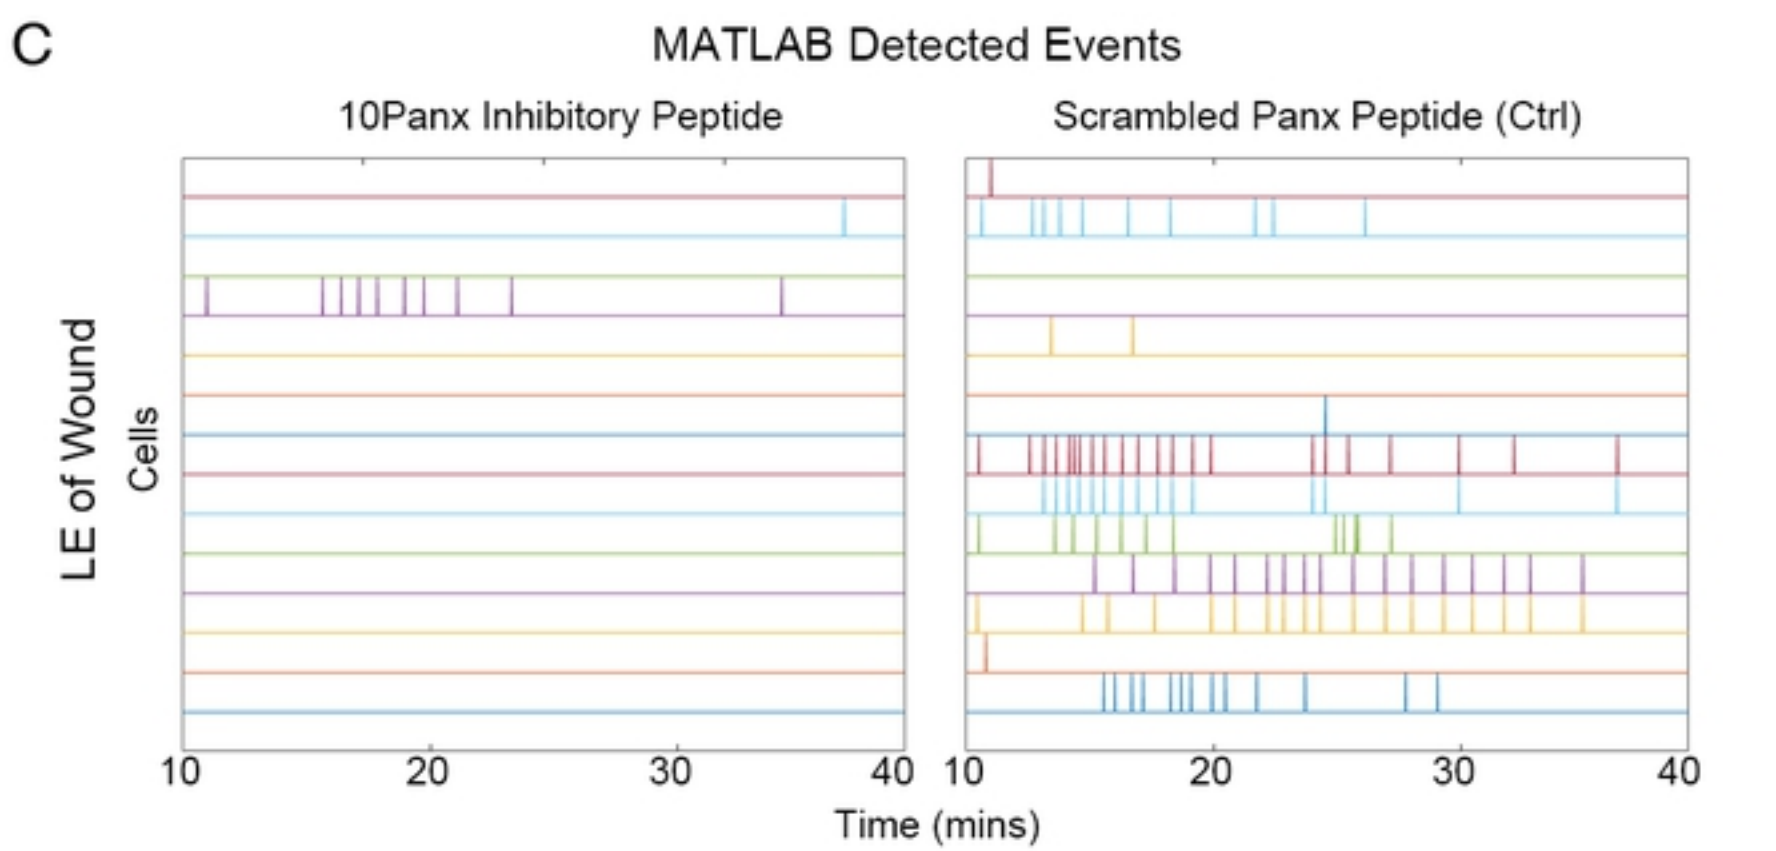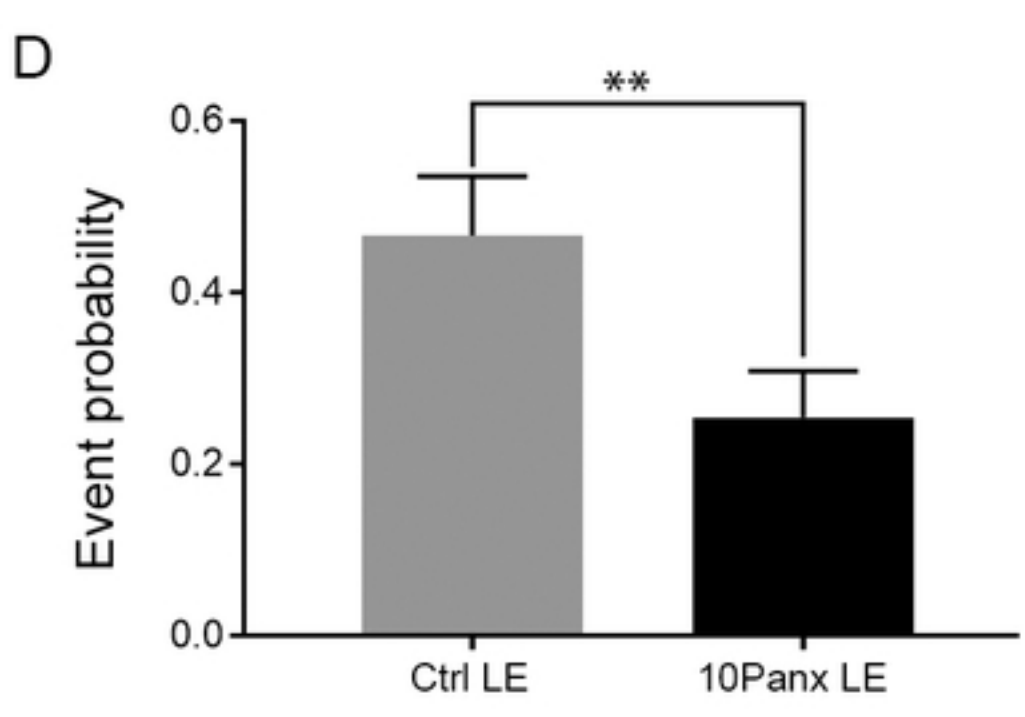

Figure 7



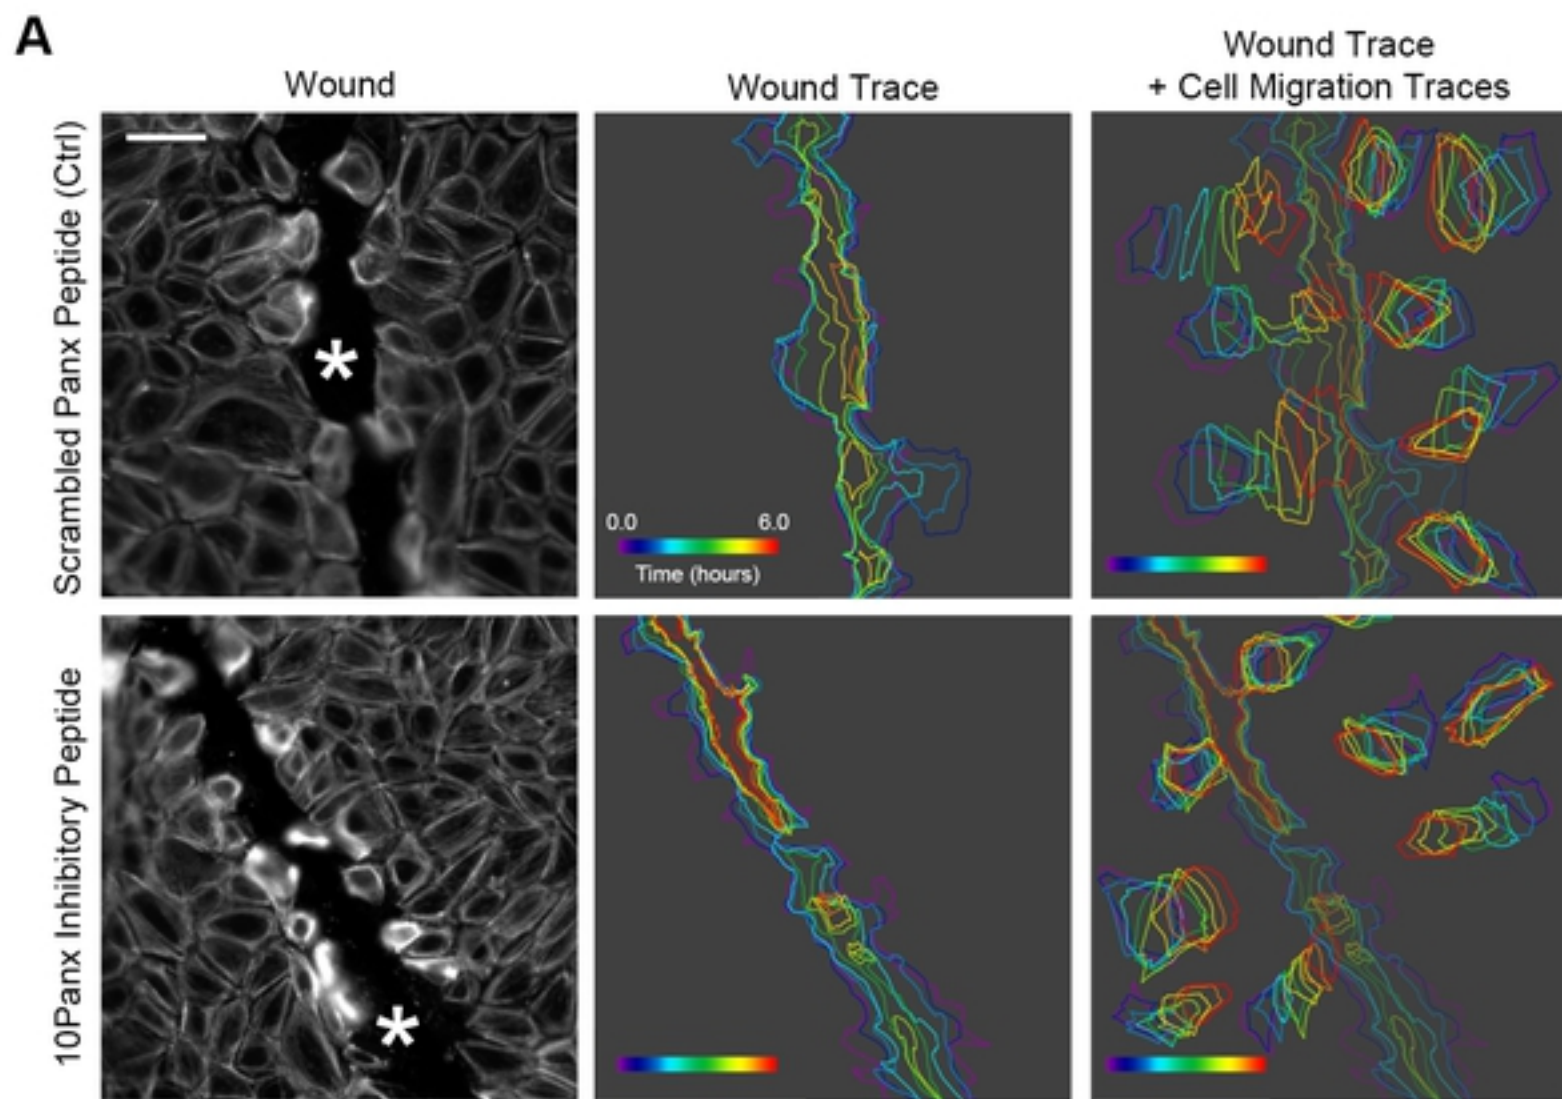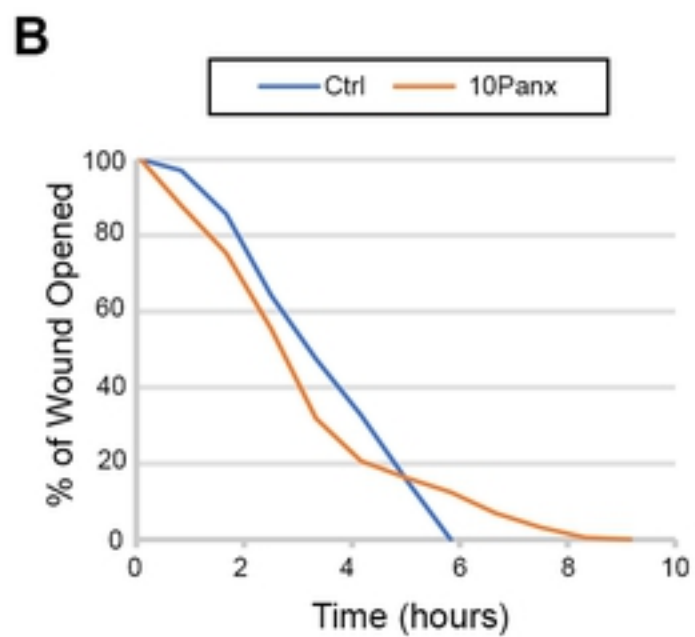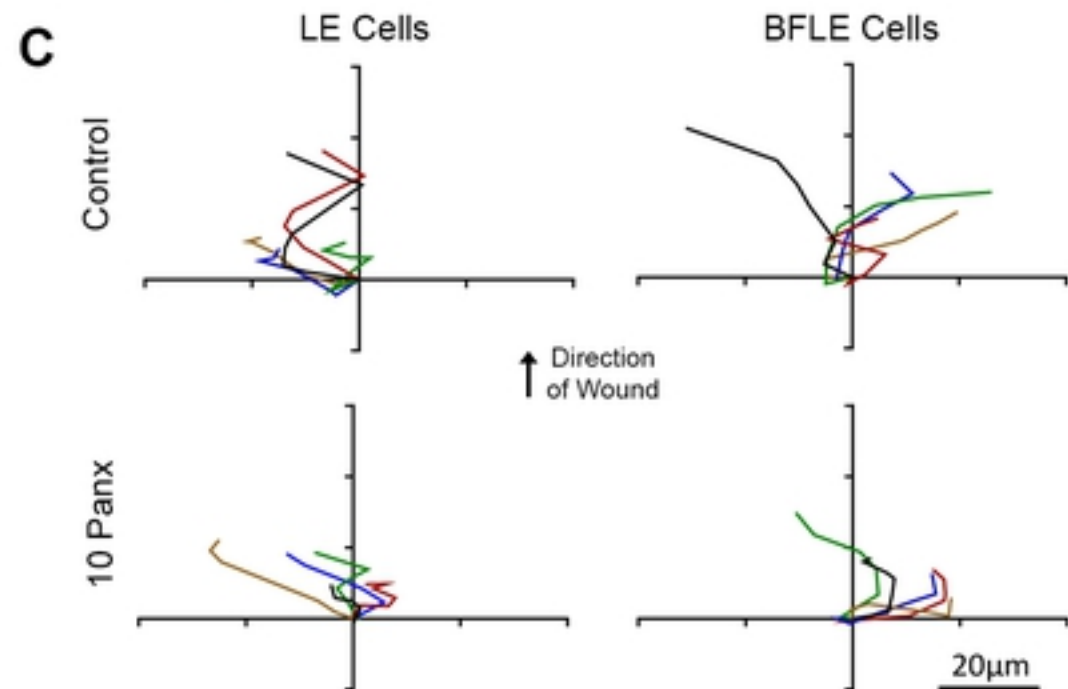

Figure 8

**A**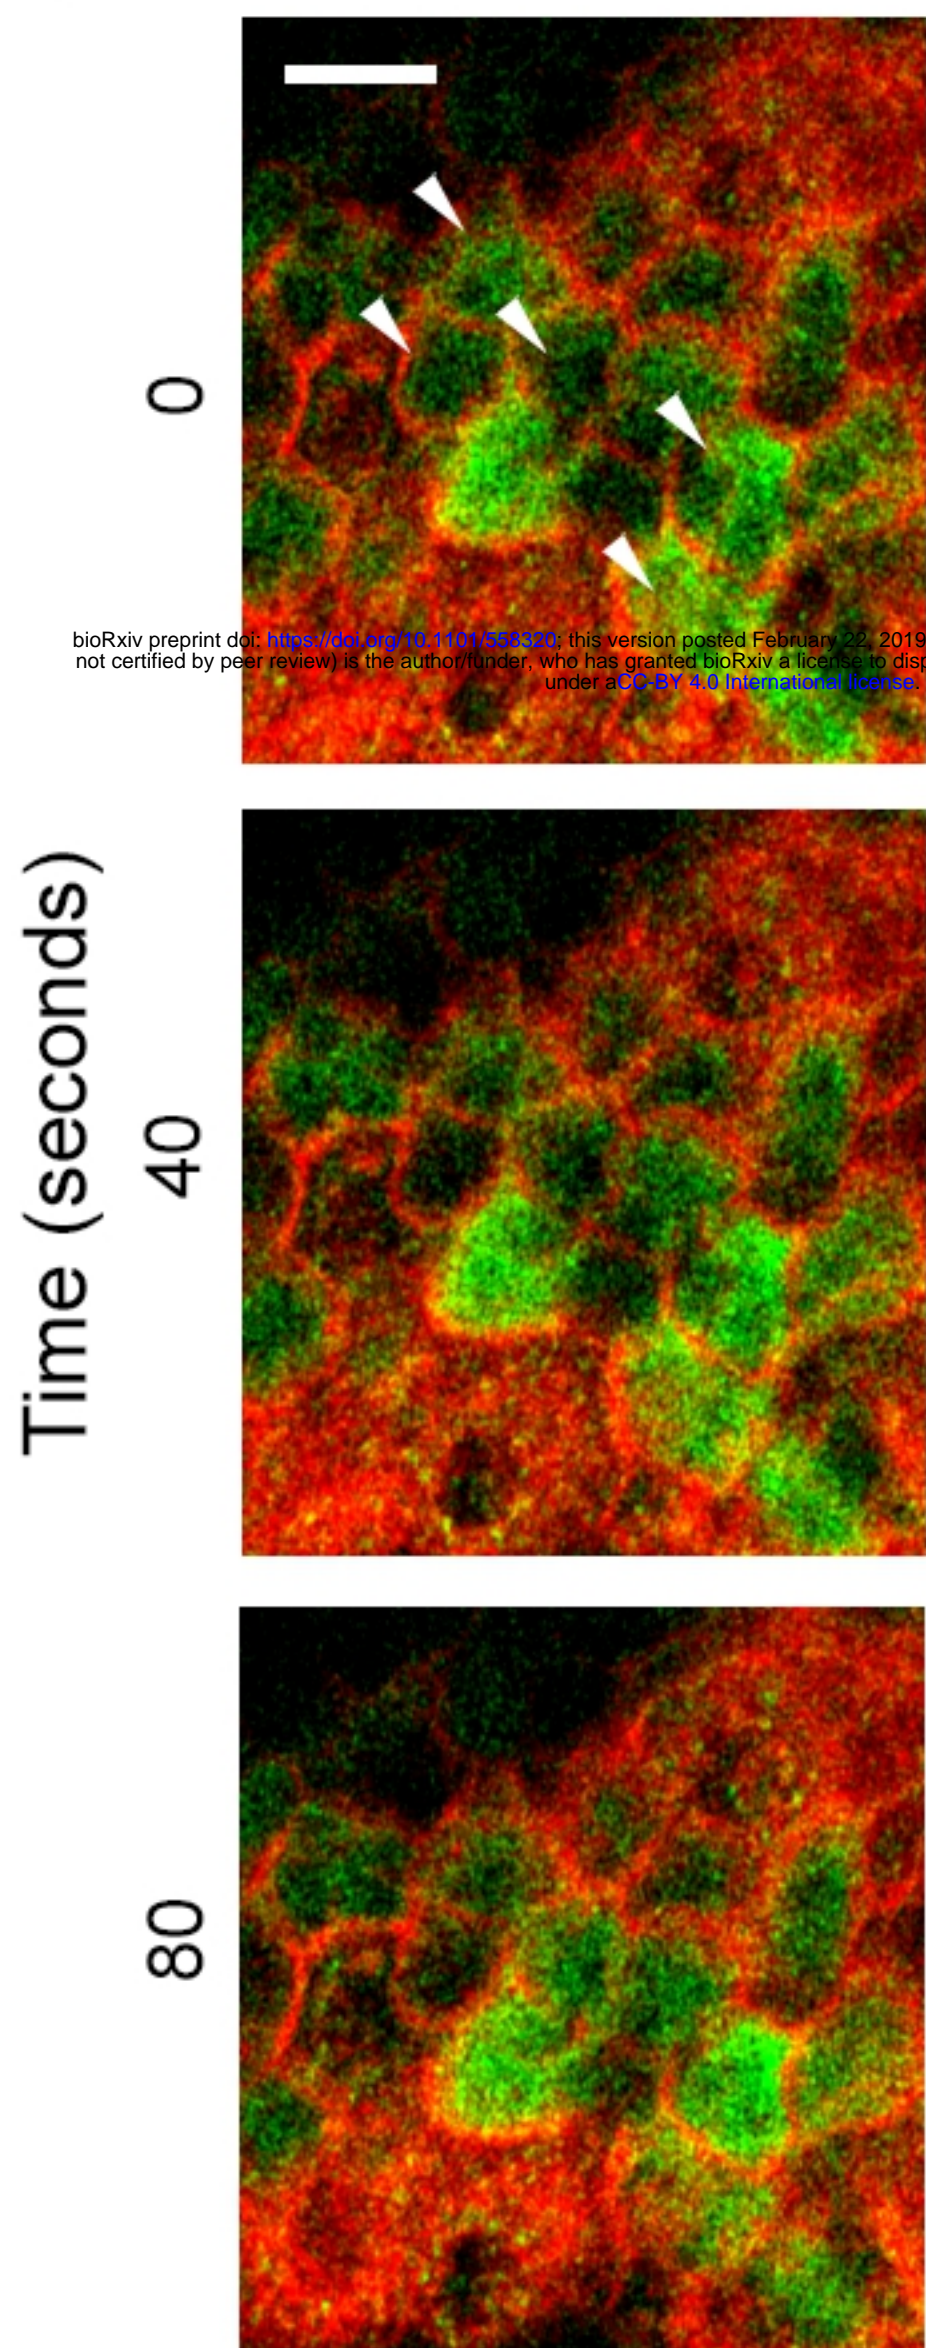**B**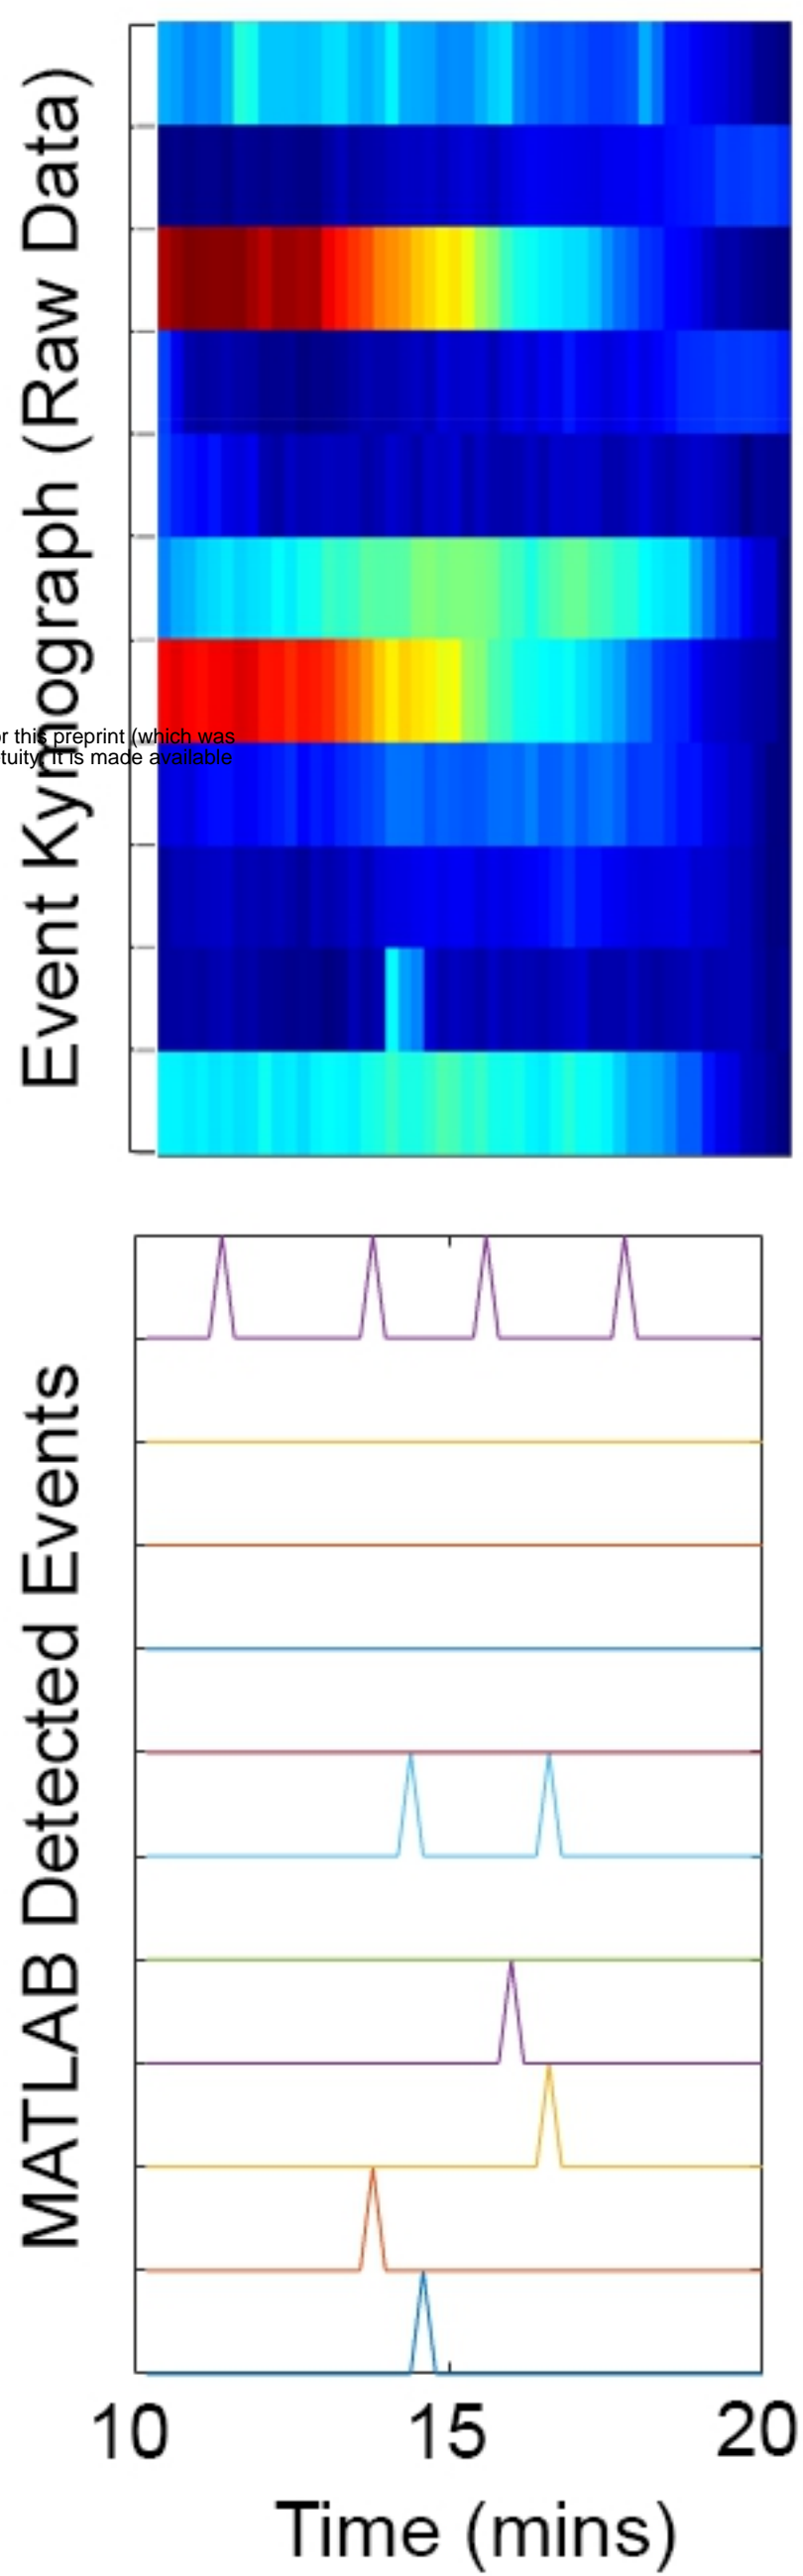

Figure 9
